# Supplementary material
Source: PubMed Central journal article supplement (PMC6585437)
Supplement: NIHMS1033752-supplement-Supporting_Information.pdf [file NIHMS1033752-supplement-Supporting_Information.pdf]

# Supporting Information

## Identification of kinases and interactors of p53 using kinase-catalyzed crosslinking and immunoprecipitation (K-CLIP)

Satish Garre, Aparni K. Gamage, Todd R. Faner, Pavithra Dedigama-Arachchige, and Mary Kay H. Pflum

Department of Chemistry, Wayne State University, 5101 Cass Avenue, Detroit, MI 48202

| <b>Table of Contents</b>                                                                 | <b>Page</b> |
|------------------------------------------------------------------------------------------|-------------|
| <b>I. Experimental Procedures</b>                                                        | <b>S2</b>   |
| <b>II. Supporting Data</b>                                                               | <b>S3</b>   |
| Figure S1. Treatment of RKO cells with ( $\pm$ )-Nutlin                                  | S3          |
| Figure S2. Kinase-catalyzed crosslinking reactions with p53                              | S4          |
| Figure S3. p53 K-CLIP using mouse antibody IP                                            | S5          |
| Table S1. Proteins identified by MS analysis in the p53 K-CLIP experiment                | S6-S8       |
| Figure S4. Peptides for p53 identified by MS analysis using K-CLIP.                      | S9          |
| Figure S5. Annotated spectra of p53 peptides identified by K-CLIP                        | S9-S11      |
| Figure S6. Peptides for DNA-PK (PRKDC) identified by MS analysis using K-CLIP.           | S12         |
| Figure S7. Annotated spectra of DNA-PK (PRKDC) peptides identified by K-CLIP             | S13         |
| Figure S8. Peptides for PKR (EI2AK2) identified by MS analysis using K-CLIP.             | S14         |
| Figure S9. Annotated spectra of PKR (EI2AK2) peptides identified by K-CLIP               | S15         |
| Figure S10. Peptides for MRCK $\beta$ (CDC42BPB) identified by MS analysis using K-CLIP. | S16         |
| Figure S11. Annotated spectra of MRCK $\beta$ (CDC42BPB) peptides identified by K-CLIP   | S17         |
| Figure S12. <i>In vitro</i> kinase assays with p53 and MRCK $\beta$                      | S18         |
| Figure S13. K-CLIP validates MRCK $\beta$ is a p53 kinase                                | S19         |
| Figure S14. Coimmunoprecipitation of MRCK $\beta$ and p53                                | S20         |
| Figure S15. MRCK $\beta$ knockdown and p53 expression levels in RKO cells                | S21         |
| Figure S16: Kinase-catalyzed crosslinking validation reactions with DNAPK                | S22         |
| Figure S17. GO biological function analysis of proteins identified by K-CLIP             | S23         |
| Figure S18. Abundance analysis of the proteins identified by K-CLIP                      | S24         |
| <b>III. References</b>                                                                   | <b>S24</b>  |

## I. Experimental Procedures

### Materials

Cell culture grade dimethylsulfoxide (DMSO) was purchased from ATCC. The disodium salt of Adenosine 5'-triphosphate (ATP.2Na), glycerol, sodium hydroxide (NaOH), potassium chloride (KCl), magnesium chloride (MgCl<sub>2</sub>), sodium chloride (NaCl), sodium dodecyl sulfate (SDS), and glacial acetic acid were purchased from Fisher. Ammonium bicarbonate, tris(2-carboxyethyl) phosphine HCl (TCEP), iodoacetamide, and proteomics grade trypsin were bought from Sigma. Triton X-100 was purchased from Fluka. Coomassie Brilliant Blue was obtained from NuSep. Trifluoroacetic acid (TFA) and Immobilion-P PVDF membrane were purchased from Millipore. SyproRuby stain was obtained from Invitrogen. Eagle's minimum essential medium (EMEM) (30-2003) and RKO cell culture sample (CRL-2577) were purchased from ATCC. Acrylamide/Bis acrylamide solution (40%, 37.5:1) was purchased from Bio-Rad. Proteomics grade formic acid was purchased from Proteochem. Protein A/G-PLUS agarose beads (SC-2003), p53 (rabbit) polyclonal antibody (SC-6243), and p53 (mouse) monoclonal antibody (SC-55476) were purchased from Santa Cruz Biotechnology Inc. DNA-PK antibody (4602P) and rabbit IgG HRP-linked secondary antibody (7074) were purchased from Cell Signaling Technology. Fetal bovine serum (FBS), antibiotic-antimycotic (100X), TrypLE™ Express (1X) with Phenol Red and Alexa Fluor® 647 Goat Anti-Rabbit IgG (H+L) (A-21244) were purchased from Life Technologies. Goat anti-mouse IgG (H+L) (HRP) (ab97040) secondary antibody was purchased from Abcam. Goat anti-mouse HiLyte Fluor™ 647-labeled secondary antibody was purchased from Anaspec. FNK antibody (GTX111495) was obtained from Genetex Inc. (±) Nutlin-3 was purchased from Cayman Chemicals.

### Instrumentation

A SPD131 DDA ThermoSavant speedvac was used to evaporate solvents *in vacuo*. SDS-PAGE apparatus was purchased from BioRad (Protean III) and a mini-gel setup was used. Western blotting was carried out using the mini-transblot electrophoretic transfer Cell apparatus from Bio-Rad. Western blot and SDS-PAGE gel images were visualized using a Typhoon 9210 scanner (Amersham Biosciences). A model 3UV-38 UV lamp (UVP, Inc.) was used for crosslinking experiments.

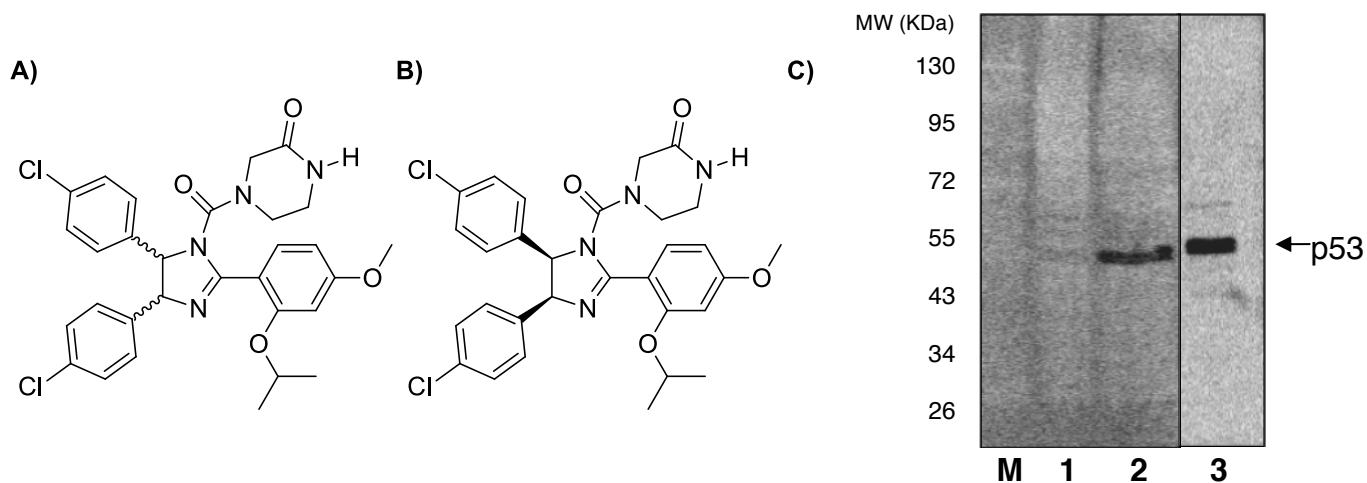

**Figure S1. Treatment of RKO cells with (±)-Nutlin-3.** (A) Chemical structure of (±)-Nutlin-3 (B) Chemical structure of (-)-Nutlin-3, the active enantiomer (C) SDS-PAGE separation and anti-p53 western blot analysis of lysates obtained after RKO cells were treated with (±)-Nutlin-3. The contents of each lane are: molecular weight marker (M), DMSO treated control cell lysates (lane 1), (±)-Nutlin-3 (10 μM) treated cell lysates (lane 2), and (±)-Nutlin-3 (20 μM) treated cell lysates (lane 3). The expected 53 kDa p53 protein band is indicated with an arrow.

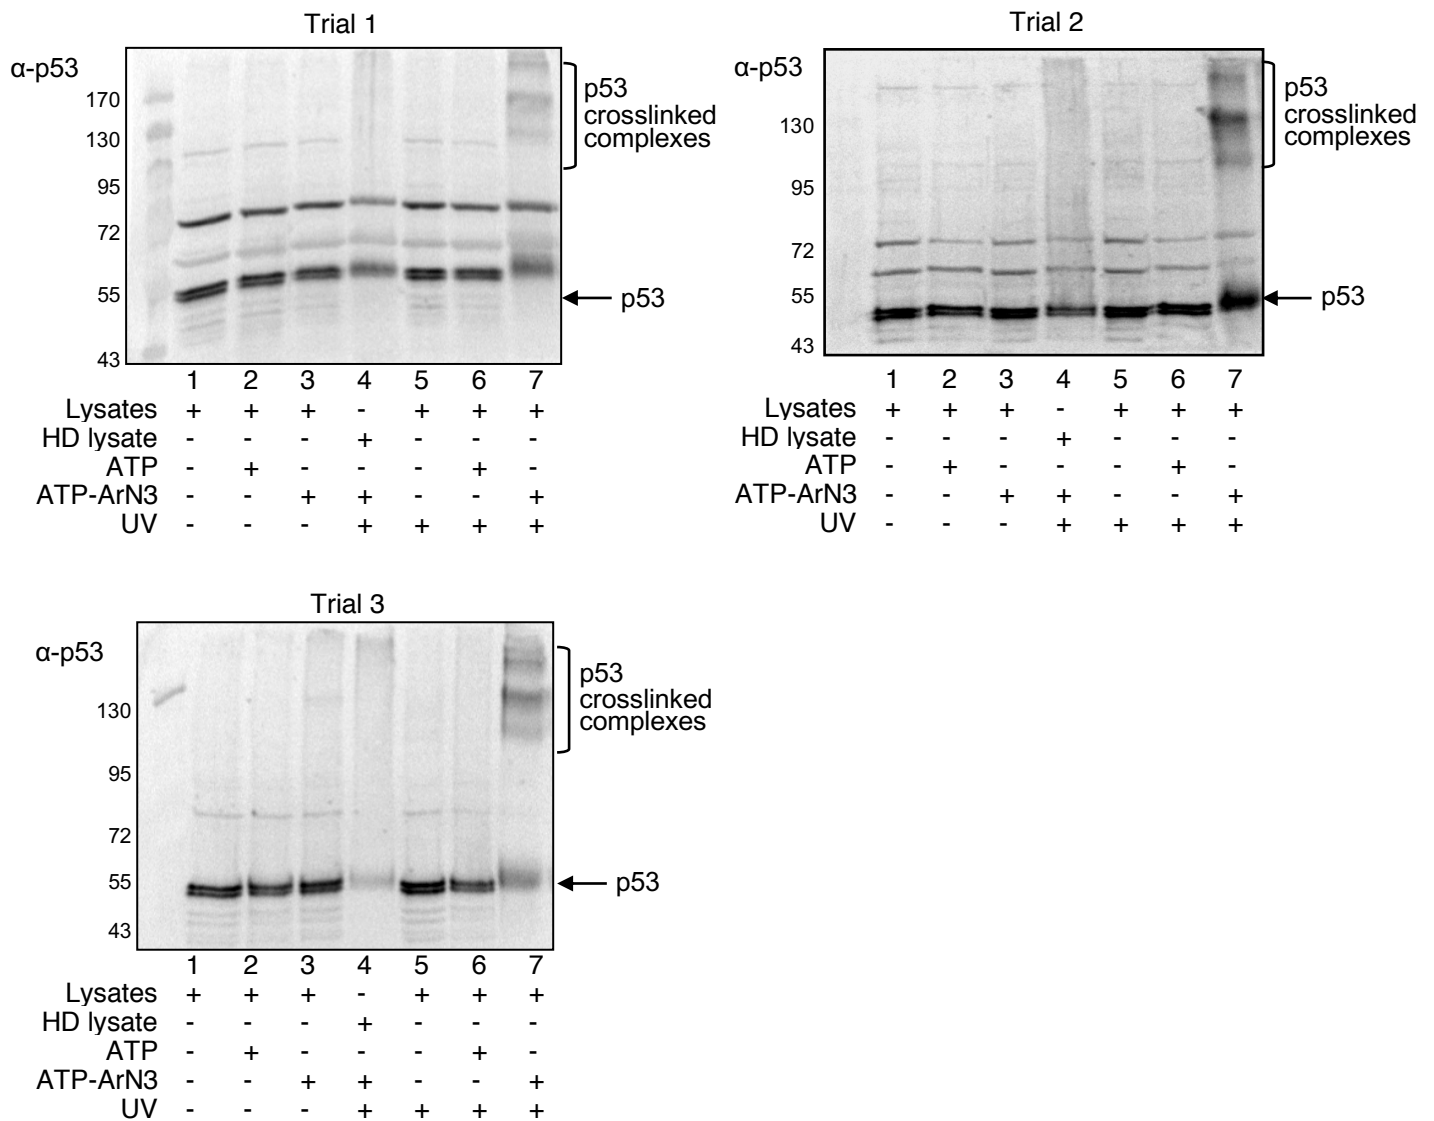

**Figure S2. Kinase-catalyzed labeling reactions with p53.** Kinase-catalyzed crosslinking reactions were performed using the indicated reaction components, followed by SDS-PAGE separation and visualization with a p53 antibody. HD lysates indicates heat-denatured lysates (lane 4). The high molecular weight crosslinked bands are indicated as p53 crosslinked complexes, and the p53 protein is also indicated with an arrow. Three trials are shown here, with the full gel image of Figure 2A in the manuscript provided as Trial 1.

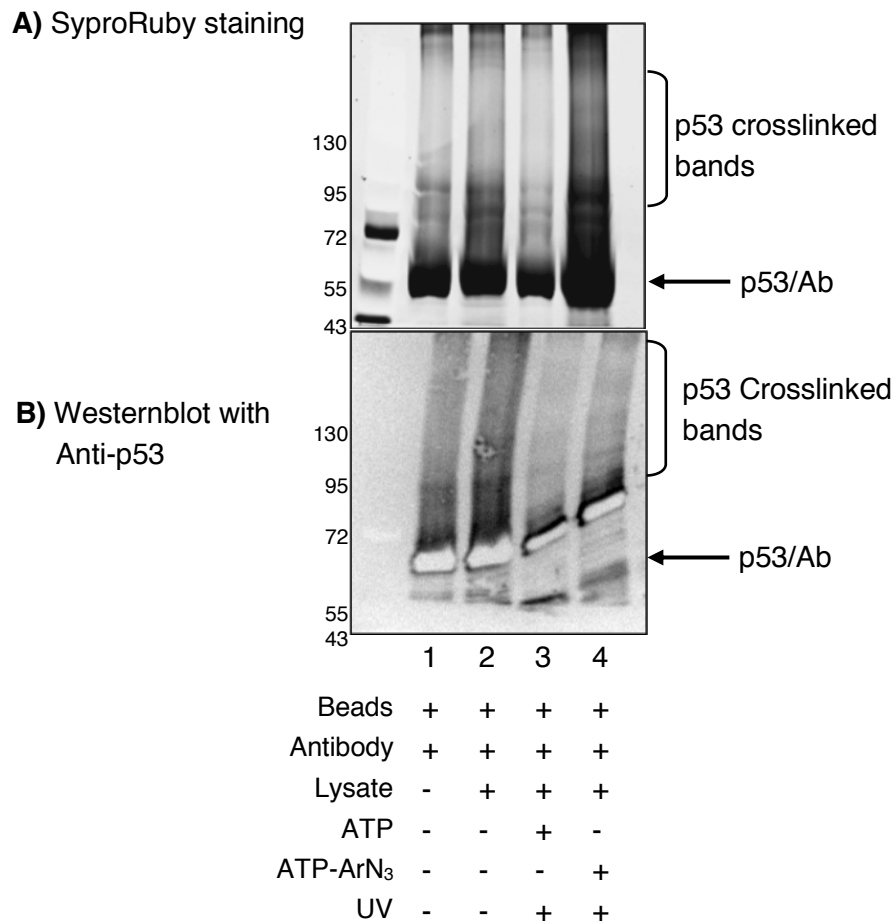

**Figure S3: Immunoprecipitation (IP) of p53-Crosslinked Complexes using a mouse monoclonal antibody.** Photocrosslinking reactions were performed by incubating the reaction components under UV as indicated under each lane at 30 °C for 2 hrs, followed by immunoprecipitation with p53 mouse monoclonal antibody, SDS-PAGE separation, and visualization with SyproRuby protein staining (top), or the rabbit polyclonal p53 antibody (bottom). ATP-ArN<sub>3</sub> (10 mM) and nutlin-treated RKO cell lysates were used in each reaction. The high molecular weight crosslinked complexes are indicated as p53 crosslinked bands. The 53 kDa band of p53 protein is indicated with an arrow. Due to co-migration of the heavy chain of the antibody from the IP with p53, the presence of antibody (Ab) is also indicated at the arrow. A molecular weight marker is shown on the far-left side of the gel images. This K-CLIP trial using rabbit polyclonal antibody for IP represents trial 2, with the first trial using mouse monoclonal antibody shown in Figure 2B of the manuscript. Both trials were analyzed by LC-MS/MS to identify p53-crosslinked proteins.

**Table S1: Proteins identified by LC-MS/MS analysis in the p53 K-CLIP experiment<sup>a</sup>**

| No. | Identified Protein                                   | Gene name   | MW<br>(kDa) | # of Peptides |    |   |    |
|-----|------------------------------------------------------|-------------|-------------|---------------|----|---|----|
|     |                                                      |             |             | A             | B  | C | D  |
| 1   | Cytoplasmic dynein 1 heavy chain 1                   | DYHC1_HUMAN | 532         | 0             | 5  | 0 | 62 |
| 2   | DNA-dependent protein kinase catalytic subunit       | PRKDC_HUMAN | 469         | 0             | 7  | 0 | 47 |
| 3   | Filamin-B                                            | FLNB_HUMAN  | 278         | 0             | 11 | 0 | 31 |
| 4   | Isoleucine--tRNA ligase, cytoplasmic, IARS           | SYIC_HUMAN  | 145         | 0             | 4  | 0 | 36 |
| 5   | Transcription intermediary factor 1-beta, TRIM28     | TIF1B_HUMAN | 89          | 0             | 11 | 0 | 29 |
| 6   | Leucine--tRNA ligase, cytoplasmic, LARS              | SYLC_HUMAN  | 134         | 0             | 7  | 0 | 32 |
| 7   | Fatty acid synthase                                  | FAS_HUMAN   | 273         | 0             | 3  | 0 | 35 |
| 8   | X-ray repair cross-complementing protein 6           | XRCC6_HUMAN | 70          | 0             | 2  | 0 | 31 |
| 9   | Poly [ADP-ribose] polymerase 1                       | PARP1_HUMAN | 113         | 0             | 4  | 0 | 29 |
| 10  | 26S proteasome non-ATPase regulatory subunit 2       | PSMD2_HUMAN | 100         | 0             | 5  | 0 | 24 |
| 11  | Polypyrimidine tract-binding protein 1               | PTBP1_HUMAN | 57          | 0             | 9  | 0 | 20 |
| 12  | Hexokinase-1                                         | HXK1_HUMAN  | 102         | 0             | 5  | 0 | 23 |
| 13  | Heterogeneous nuclear ribonucleoprotein U            | HNRPU_HUMAN | 91          | 0             | 4  | 0 | 24 |
| 14  | Coatomer subunit beta                                | COPB_HUMAN  | 107         | 0             | 7  | 0 | 20 |
| 15  | Myosin-9                                             | MYH9_HUMAN  | 227         | 0             | 2  | 0 | 25 |
| 16  | Lon protease homolog, mitochondrial                  | LONM_HUMAN  | 106         | 0             | 3  | 0 | 23 |
| 17  | Gamma-interferon-inducible protein 16                | IF16_HUMAN  | 88          | 0             | 4  | 0 | 20 |
| 18  | Translational activator GCN1                         | GCN1L_HUMAN | 293         | 0             | 1  | 0 | 22 |
| 19  | Eukaryotic translation initiation factor 3 subunit C | EIF3C_HUMAN | 105         | 0             | 3  | 0 | 20 |
| 20  | Ras GTPase-activating-like protein                   | IQGA1_HUMAN | 189         | 0             | 2  | 0 | 20 |
| 21  | X-ray repair cross-complementing protein 5           | XRCC5_HUMAN | 83          | 0             | 2  | 0 | 20 |
| 22  | Sarcoplasmic/endoplasmic reticulum calcium ATPase 2  | AT2A2_HUMAN | 115         | 0             | 3  | 0 | 17 |
| 23  | ATP-dependent RNA helicase                           | DDX3X_HUMAN | 73          | 0             | 4  | 0 | 16 |
| 24  | Importin-4                                           | IPO4_HUMAN  | 119         | 0             | 3  | 0 | 16 |
| 25  | Exportin-1                                           | XPO1_HUMAN  | 123         | 0             | 2  | 0 | 17 |
| 26  | Bifunctional glutamate/proline--tRNA ligase, EPRS    | SYEP_HUMAN  | 171         | 0             | 3  | 0 | 16 |
| 27  | ATP-dependent RNA helicase DDX1                      | DDX1_HUMAN  | 82          | 0             | 5  | 0 | 14 |
| 28  | Dolichyl-diphosphooligosaccharide--protein           | RPN1_HUMAN  | 69          | 0             | 4  | 0 | 15 |
| 29  | CAD protein                                          | PYR1_HUMAN  | 243         | 0             | 2  | 0 | 17 |
| 30  | Heat shock 70 kDa protein 4L, HSPA4                  | HS74L_HUMAN | 95          | 0             | 6  | 0 | 13 |
| 31  | pre-mRNA-splicing factor ATP-dependent RNA helicase  | DHX15_HUMAN | 91          | 0             | 3  | 0 | 15 |
| 32  | U5 small nuclear ribonucleoprotein 200 kDa helicase  | U520_HUMAN  | 245         | 0             | 3  | 0 | 14 |
| 33  | Programmed cell death 6-interacting protein          | PDC6I_HUMAN | 96          | 0             | 3  | 0 | 14 |
| 34  | Sodium/potassium-transporting ATPase subunit alpha1  | AT1A1_HUMAN | 113         | 0             | 2  | 0 | 15 |
| 35  | Myb-binding protein 1A, MYBBP1A                      | MBB1A_HUMAN | 149         | 0             | 1  | 0 | 15 |
| 36  | Calpain-2 catalytic subunit                          | CAN2_HUMAN  | 80          | 0             | 4  | 0 | 12 |
| 37  | Coronin-1C OS=Homo sapiens                           | COR1C_HUMAN | 53          | 0             | 10 | 0 | 6  |
| 38  | ATP-dependent RNA helicase A                         | DHX9_HUMAN  | 141         | 0             | 1  | 0 | 15 |
| 39  | Trifunctional enzyme subunit alpha, HADHA            | ECHA_HUMAN  | 83          | 0             | 3  | 0 | 13 |
| 40  | FACT complex subunit SSRP1                           | SSRP1_HUMAN | 81          | 0             | 5  | 0 | 10 |
| 41  | ADP/ATP translocase 2, SLC25A5                       | ADT2_HUMAN  | 33          | 0             | 3  | 0 | 12 |
| 42  | Talin-1                                              | TLN1_HUMAN  | 270         | 0             | 2  | 0 | 13 |
| 43  | Arginine--tRNA ligase, cytoplasmic                   | SYRC_HUMAN  | 75          | 0             | 2  | 0 | 13 |
| 44  | Dolichyl-diphosphooligosaccharide--protein           | RPN2_HUMAN  | 69          | 0             | 5  | 0 | 10 |

|    |                                                       |             |     |   |   |   |    |
|----|-------------------------------------------------------|-------------|-----|---|---|---|----|
| 45 | Coatomer subunit alpha                                | COPA_HUMAN  | 138 | 0 | 1 | 0 | 13 |
| 46 | Matrin-3                                              | MATR3_HUMAN | 95  | 0 | 2 | 0 | 12 |
| 47 | Trifunctional purine biosynthetic protein adenosine-3 | PUR2_HUMAN  | 108 | 0 | 3 | 0 | 11 |
| 48 | General vesicular transport factor p115 SV=2          | USO1_HUMAN  | 108 | 0 | 2 | 0 | 12 |
| 49 | Importin-5                                            | IPO5_HUMAN  | 124 | 0 | 2 | 0 | 11 |
| 50 | Extended synaptotagmin-1                              | ESYT1_HUMAN | 123 | 0 | 3 | 0 | 10 |
| 51 | N-acetyltransferase 10                                | NAT10_HUMAN | 116 | 0 | 2 | 0 | 11 |
| 52 | Coatomer subunit gamma-1                              | COPG1_HUMAN | 98  | 0 | 3 | 0 | 10 |
| 53 | Alanine--tRNA ligase, cytoplasmic, AARS               | SYAC_HUMAN  | 107 | 0 | 3 | 0 | 10 |
| 54 | Splicing factor 3B subunit 3                          | SF3B3_HUMAN | 136 | 0 | 2 | 0 | 10 |
| 55 | Protein disulfide-isomerase A6                        | PDIA6_HUMAN | 48  | 0 | 1 | 0 | 11 |
| 56 | Kinesin-1 heavy chain OS=Homo sapiens, KIF5B          | KINH_HUMAN  | 110 | 0 | 3 | 0 | 8  |
| 57 | Squamous cell carcinoma antigen recognized by T-cells | SART3_HUMAN | 110 | 0 | 2 | 0 | 9  |
| 58 | 26S proteasome non-ATPase regulatory subunit 3        | PSMD3_HUMAN | 61  | 0 | 7 | 0 | 4  |
| 59 | General transcription factor II-I                     | GTF2I_HUMAN | 112 | 0 | 1 | 0 | 9  |
| 60 | Importin subunit beta-1                               | IMB1_HUMAN  | 97  | 0 | 1 | 0 | 9  |
| 61 | DNA replication licensing factor MCM3                 | MCM3_HUMAN  | 91  | 0 | 2 | 0 | 8  |
| 62 | Transitional endoplasmic reticulum ATPase, VCP        | TERA_HUMAN  | 89  | 0 | 1 | 0 | 9  |
| 63 | DNA replication licensing factor MCM6                 | MCM6_HUMAN  | 93  | 0 | 1 | 0 | 9  |
| 64 | ATP-dependent DNA helicase                            | RECQ1_HUMAN | 73  | 0 | 1 | 0 | 9  |
| 65 | Cofilin-1                                             | COF1_HUMAN  | 19  | 0 | 1 | 0 | 9  |
| 66 | ADP/ATP translocase 3, SLC25A6                        | ADT3_HUMAN  | 33  | 0 | 1 | 0 | 8  |
| 67 | Niban-like protein 1                                  | NIBL1_HUMAN | 84  | 0 | 1 | 0 | 8  |
| 68 | Monofunctional C1-tetrahydrofolate synthase,          | C1TM_HUMAN  | 106 | 0 | 3 | 0 | 6  |
| 69 | Nucleoprotein TPR                                     | TPR_HUMAN   | 267 | 0 | 1 | 0 | 8  |
| 70 | Dynamin-like 120 kDa protein, mitochondrial           | OPA1_HUMAN  | 112 | 0 | 2 | 0 | 7  |
| 71 | Copine-1                                              | CPNE1_HUMAN | 59  | 0 | 5 | 0 | 4  |
| 72 | Heterogeneous nuclear ribonucleoprotein R             | HNRPR_HUMAN | 71  | 0 | 1 | 0 | 8  |
| 73 | DBIRD complex subunit KIAA1967                        | K1967_HUMAN | 103 | 0 | 1 | 0 | 7  |
| 74 | Exosome complex exonuclease RRP44, DIS3               | RRP44_HUMAN | 109 | 0 | 1 | 0 | 7  |
| 75 | tRNA (cytosine(34)-C(5))-methyltransferase            | NSUN2_HUMAN | 86  | 0 | 1 | 0 | 7  |
| 76 | 26S proteasome non-ATPase regulatory subunit 1        | PSMD1_HUMAN | 106 | 0 | 3 | 0 | 5  |
| 77 | Apoptosis-inducing factor 1, mitochondrial            | AIFM1_HUMAN | 67  | 0 | 4 | 0 | 4  |
| 78 | Stress-induced-phosphoprotein 1                       | STIP1_HUMAN | 63  | 0 | 2 | 0 | 6  |
| 79 | Non-POU domain-containing octamer-binding protein     | NONO_HUMAN  | 54  | 0 | 2 | 0 | 5  |
| 80 | Asparagine synthetase [glutamine-hydrolyzing]         | ASNS_HUMAN  | 64  | 0 | 3 | 0 | 4  |
| 81 | NADPH:adrenodoxin oxidoreductase, mitochondrial       | ADRO_HUMAN  | 54  | 0 | 4 | 0 | 3  |
| 82 | Neutral amino acid transporter B(0)                   | AAAT_HUMAN  | 57  | 0 | 1 | 0 | 6  |
| 83 | Dynamin-2 SV=2                                        | DYN2_HUMAN  | 98  | 0 | 1 | 0 | 6  |
| 84 | Peptidyl-prolyl cis-trans isomerase FKBP4             | FKBP4_HUMAN | 52  | 0 | 5 | 0 | 2  |
| 85 | Far upstream element-binding protein 2, KHSRP         | FUBP2_HUMAN | 73  | 0 | 1 | 0 | 6  |
| 86 | Serine/threonine-protein phosphatase 2A, PPP2R1A      | 2AAA_HUMAN  | 65  | 0 | 1 | 0 | 6  |
| 87 | Oxysterol-binding protein-related protein 8           | OSBL8_HUMAN | 101 | 0 | 2 | 0 | 5  |
| 88 | CTP synthase 1, CTPS1                                 | PYRG1_HUMAN | 67  | 0 | 1 | 0 | 6  |
| 89 | RuvB-like 1                                           | RUVB1_HUMAN | 50  | 0 | 1 | 0 | 6  |
| 90 | RNA-binding protein 12                                | RBM12_HUMAN | 97  | 0 | 1 | 0 | 6  |
| 91 | Splicing factor 3A subunit 1                          | SF3A1_HUMAN | 89  | 0 | 1 | 0 | 6  |

|     |                                                      |             |     |   |   |   |   |
|-----|------------------------------------------------------|-------------|-----|---|---|---|---|
| 92  | Valine--tRNA ligase, VARS                            | SYVC_HUMAN  | 140 | 0 | 1 | 0 | 6 |
| 93  | Methionine--tRNA ligase, cytoplasmic, MARS           | SYMC_HUMAN  | 101 | 0 | 2 | 0 | 5 |
| 94  | Fascin                                               | FSCN1_HUMAN | 55  | 0 | 2 | 0 | 4 |
| 95  | Aspartate--tRNA ligase, cytoplasmic, DARS            | SYDC_HUMAN  | 57  | 0 | 2 | 0 | 4 |
| 96  | Metastasis-associated protein MTA2                   | MTA2_HUMAN  | 75  | 0 | 1 | 0 | 5 |
| 97  | Far upstream element-binding protein 3               | FUBP3_HUMAN | 62  | 0 | 3 | 0 | 3 |
| 98  | Glutamine--tRNA ligase, QARS                         | SYQ_HUMAN   | 88  | 0 | 1 | 0 | 5 |
| 99  | Protein unc-45 homolog A                             | UN45A_HUMAN | 103 | 0 | 1 | 0 | 5 |
| 100 | 26S protease regulatory subunit 4, PSMC1             | PRS4_HUMAN  | 49  | 0 | 1 | 0 | 5 |
| 101 | MMS19 nucleotide excision repair protein homolog     | MMS19_HUMAN | 113 | 0 | 2 | 0 | 3 |
| 102 | Drebrin, DBN1                                        | DREB_HUMAN  | 71  | 0 | 1 | 0 | 4 |
| 103 | Tyrosine--tRNA ligase, cytoplasmic, YARS             | SYYC_HUMAN  | 59  | 0 | 4 | 0 | 1 |
| 104 | Phenylalanine--tRNA ligase alpha subunit, FARSSV     | SYFA_HUMAN  | 58  | 0 | 2 | 0 | 3 |
| 105 | Coatomer subunit beta'                               | COPB2_HUMAN | 102 | 0 | 1 | 0 | 4 |
| 106 | Heterogeneous nuclear ribonucleoprotein L            | HNRPL_HUMAN | 64  | 0 | 3 | 0 | 2 |
| 107 | Ubiquitin-protein ligase E3C                         | UBE3C_HUMAN | 124 | 0 | 1 | 0 | 4 |
| 108 | Hexokinase-2, HK2                                    | HXK2_HUMAN  | 102 | 0 | 1 | 0 | 3 |
| 109 | 5'-3' exoribonuclease 2                              | XRN2_HUMAN  | 109 | 0 | 2 | 0 | 2 |
| 110 | Probable ATP-dependent RNA helicase DDX41            | DDX41_HUMAN | 70  | 0 | 2 | 0 | 2 |
| 111 | Caprin                                               | CAPR1_HUMAN | 78  | 0 | 1 | 0 | 3 |
| 112 | Protein LYRIC, MTDH                                  | LYRIC_HUMAN | 64  | 0 | 1 | 0 | 3 |
| 113 | Serine/threonine-protein kinase MRCK beta            | MRCKB_HUMAN | 194 | 0 | 3 | 0 | 1 |
| 114 | Desmocollin-1                                        | DSC1_HUMAN  | 100 | 0 | 1 | 0 | 3 |
| 115 | Adenylyl cyclase-associated protein 1                | CAP1_HUMAN  | 52  | 0 | 1 | 0 | 3 |
| 116 | Interferon-induced, double-stranded RNA-activated    | E2AK2_HUMAN | 62  | 0 | 1 | 0 | 3 |
| 117 | DNA replication licensing factor MCM7                | MCM7_HUMAN  | 81  | 0 | 1 | 0 | 3 |
| 118 | Importin-9                                           | IPO9_HUMAN  | 116 | 0 | 1 | 0 | 2 |
| 119 | Exportin-7                                           | XPO7_HUMAN  | 124 | 0 | 1 | 0 | 2 |
| 120 | Importin-11                                          | IPO11_HUMAN | 113 | 0 | 2 | 0 | 1 |
| 121 | Zymogen granule protein 16 homolog B                 | ZG16B_HUMAN | 23  | 0 | 1 | 0 | 2 |
| 122 | Alpha-aminoacidic semialdehyde synthase,             | AASS_HUMAN  | 102 | 0 | 1 | 0 | 2 |
| 123 | Coatomer subunit delta, ARCN1                        | COPD_HUMAN  | 57  | 0 | 1 | 0 | 2 |
| 124 | DnaJ homolog subfamily C member 2                    | DNJC2_HUMAN | 72  | 0 | 1 | 0 | 2 |
| 125 | Dihydrolipoyllysine-residue succinyltransferase      | ODO2_HUMAN  | 49  | 0 | 2 | 0 | 1 |
| 126 | Pentatricopeptide repeat domain-containing protein 3 | PTCD3_HUMAN | 79  | 0 | 1 | 0 | 2 |
| 127 | SCY1-like protein 2                                  | SCYL2_HUMAN | 104 | 0 | 1 | 0 | 2 |
| 128 | Protein VAC14 homolog                                | VAC14_HUMAN | 88  | 0 | 1 | 0 | 2 |

<sup>a</sup>This table catalogs the number of unique peptides identified after K-CLIP. Lettered columns on right display the number of unique peptides observed for the indicated proteins in uncrosslinked (A and C) or crosslinked (B and D) K-CLIP reactions with a rabbit (A and B) or mouse (C and D) p53 antibody immunoprecipitation. The parameters in Scaffold used in this analysis were set to a 90% protein threshold, 99.9% peptide threshold, with the minimum number of peptides set to 1. Only proteins observed in crosslinked reactions (columns B and D), but not uncrosslinked reactions (columns A and C) are displayed as hits. Proteins highlighted in yellow are kinases included in Table 1. Proteins highlighted in green are direct interacting proteins (Figure 5B) and proteins highlighted in blue are indirect associated proteins (Figure 5A) of p53.



P53\_HUMAN (100%), 43,653.4 Da

Cellular tumor antigen p53 OS=Homo sapiens GN=TP53 PE=1 SV=4

7 exclusive unique peptides, 7 exclusive unique spectra, 14 total spectra, 85/393 amino acids (22% coverage)

|                            |                            |                            |                            |                            |
|----------------------------|----------------------------|----------------------------|----------------------------|----------------------------|
| M E E P Q S D P S V        | E P P L S Q E T F S        | D L W K L L P E N N        | V L S P L P S Q A M        | D D L M L S P D D I        |
| E Q W F T E D P G P        | D E A P R M P E A A        | P P V A P A P A A P        | T P A A P A P A P S        | W P L S S S V P S Q        |
| K T Y Q G S Y G F R        | L G F L H S G T A K        | <b>S V T C T Y S P A L</b> | <b>N K M F C Q L A K T</b> | C P V Q L W V D S T        |
| P P P G T R V R A M        | A I Y K Q S Q H M T        | E V V R R C P H H E        | <b>R C S D S D G L A P</b> | <b>P O H L I R</b> V E G N |
| L R <b>V E Y L D D R N</b> | <b>T F R</b> H S V V V P Y | E P P E V G S D C T        | T I H Y N Y M C N S        | S C M G G M N R <b>R P</b> |
| <b>I L T I I T L E D S</b> | <b>S G N L L G R</b> N S F | E V R V C A C P G R        | D R R T E E E N L R        | K K G E P H H E L P        |
| P G S T K R <b>A L P N</b> | <b>N T S S S P O P K</b>   | K P L D G E Y F T L        | Q I R G R E R F E M        | F R <b>E L N E A L E L</b> |
| <b>K D A Q A G K</b> E P G | G S R A H S S H L K        | S K K G Q S T S R H        | K K L M F K T E G P        | D S D                      |

**Figure S4: Peptides for p53 identified by LC-MS/MS analysis using K-CLIP.** Primary sequence of p53 is shown, with amino acids observed in the LC-MS/MS analysis highlighted in yellow. The parameters set were protein threshold- 90%, peptide threshold- 99.9%, with minimum number of peptides set to 1.

Peptide Sequence: (R)LGFLHSGTAK(S)

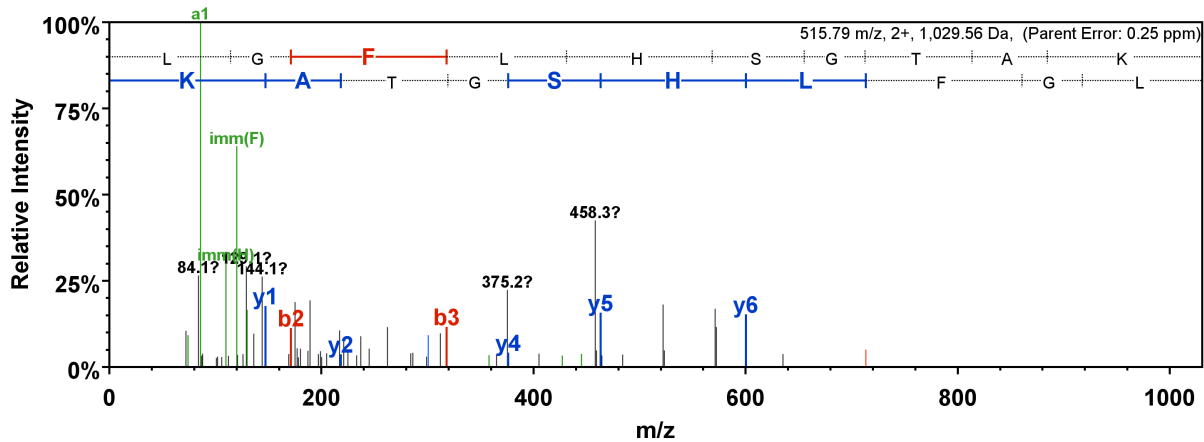

Peptide Sequence: (R)VEYLDDRNTFR(H)

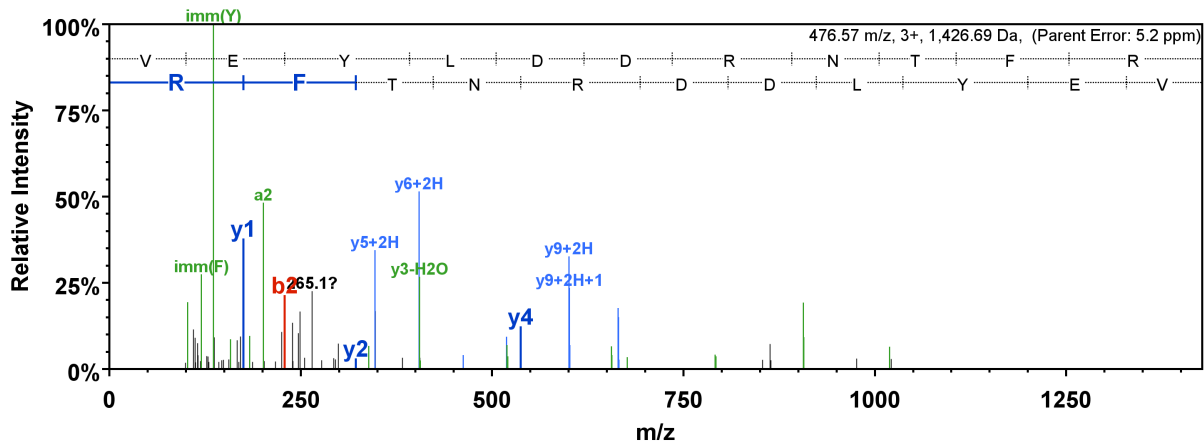

Peptide Sequence: (K)SVTcTYSPALNK(M)

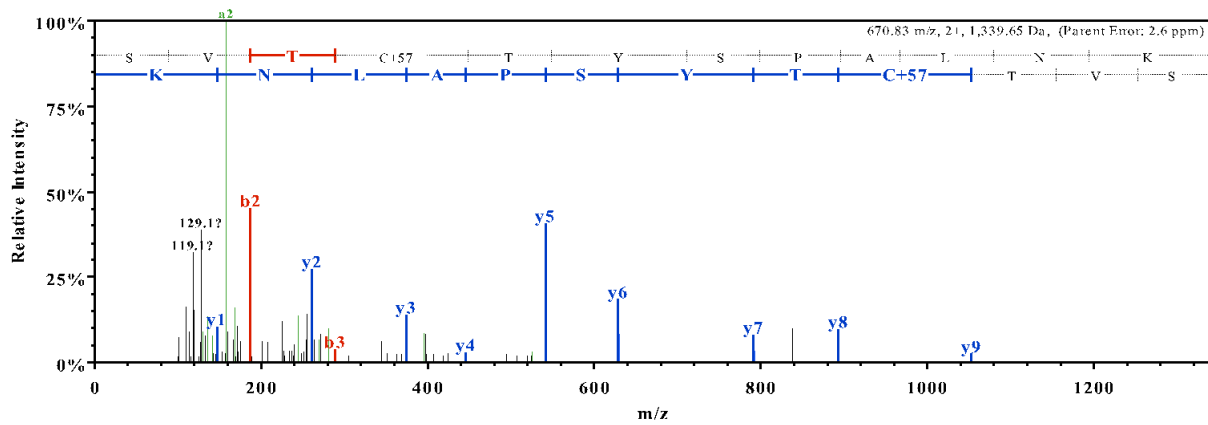

Peptide Sequence: (R)cSDSDGLAPPQHLIR(V)

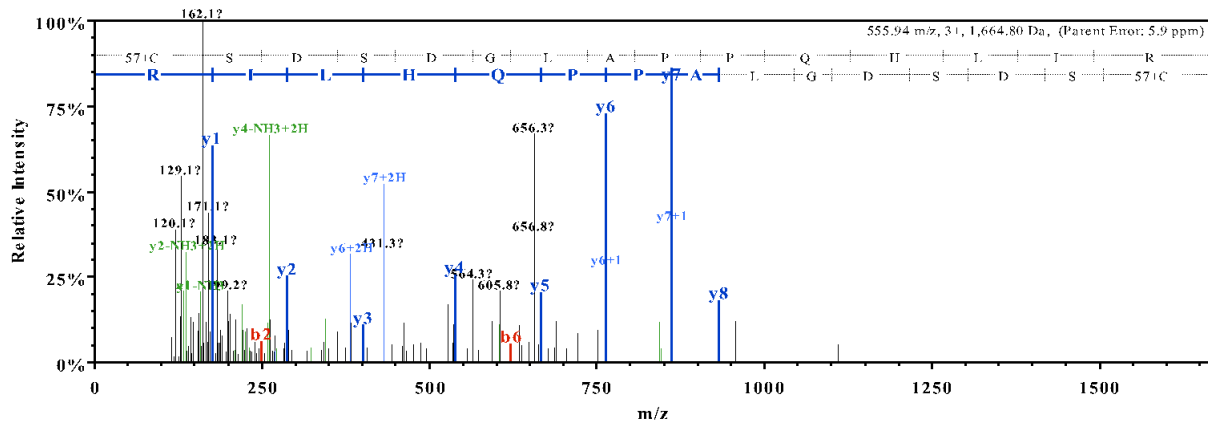

Peptide Sequence: (R)RPILTITLEDSSGNLLGR(N)

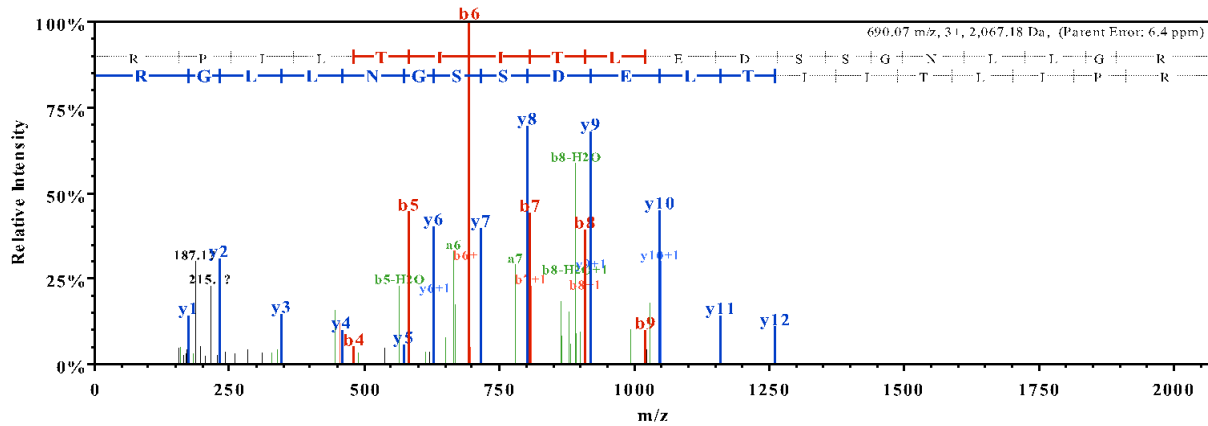

Peptide Sequence: (R)ALPNNTSSSPQPK(K)

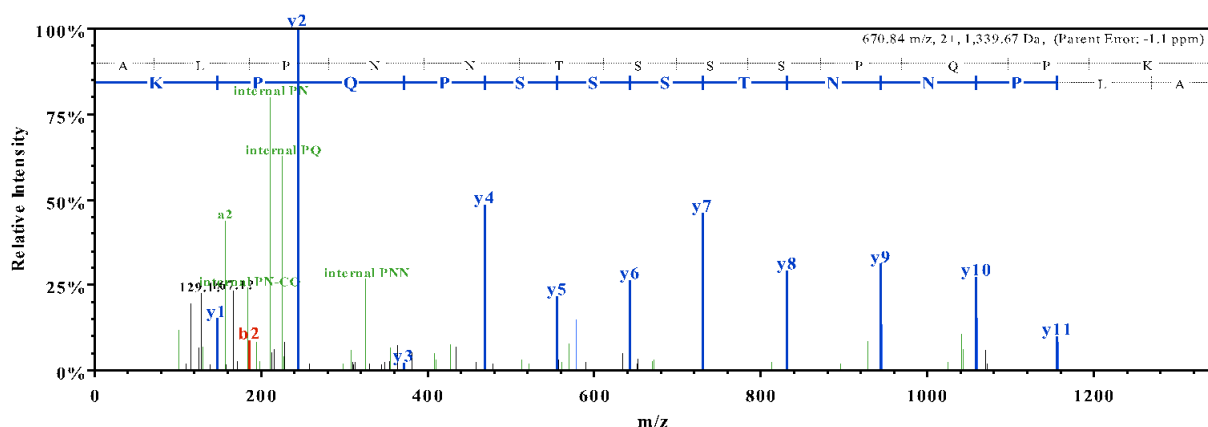

Peptide Sequence: (R)ELNEALELK(D)

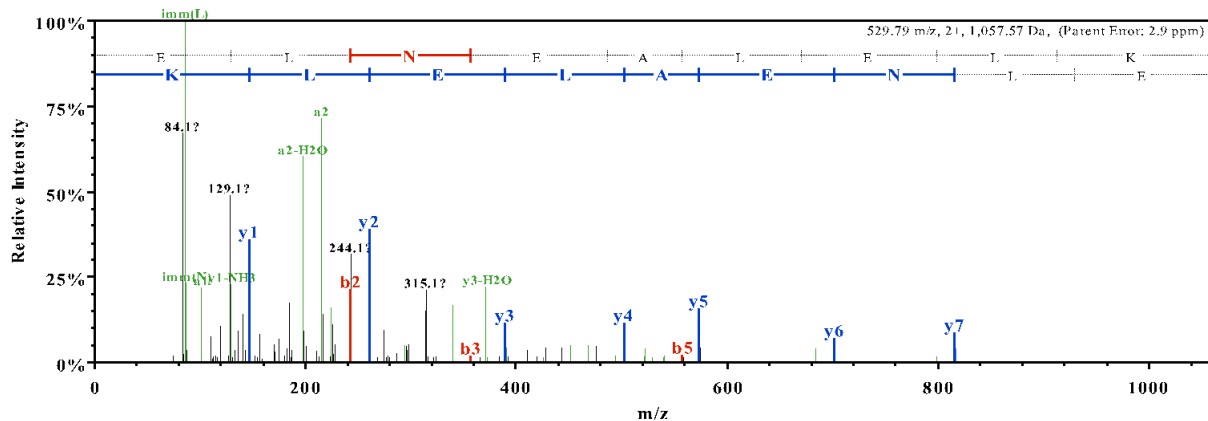

Peptide Sequence: (R)ELNEALELKDAQAGK(E)

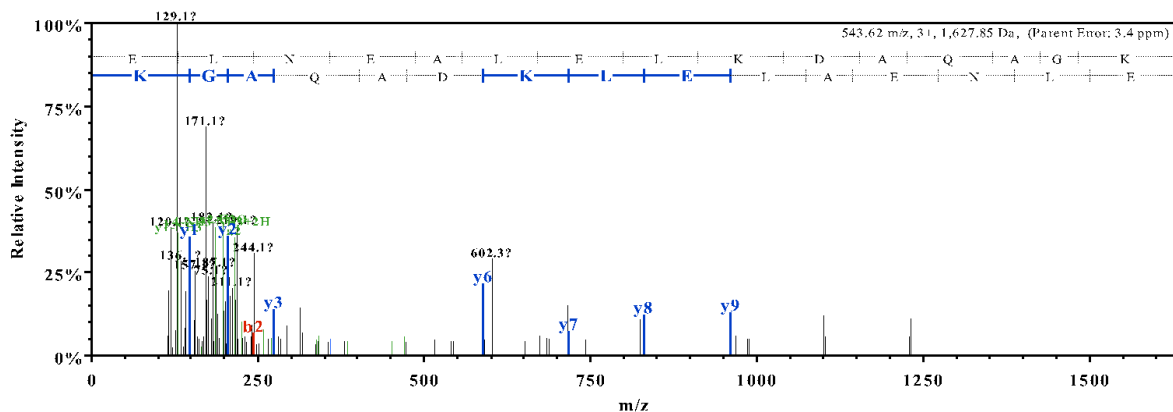

**Figure S5: Annotated spectra of p53 peptides identified by LC-MS/MS analysis shown in Figure S4. A representation of the peptide fragments identified is shown with the peptide sequence on top of each spectrum.**

PRKDC\_HUMAN (100%), 469,095.5 Da  
 DNA-dependent protein kinase catalytic subunit OS=Homo sapiens GN=PRKDC PE=1 SV=3  
 42 exclusive unique peptides, 44 exclusive unique spectra, 47 total spectra, 559/4128 amino acids (14% coverage)

|             |             |             |             |             |
|-------------|-------------|-------------|-------------|-------------|
| MAGSGAGVRC  | SLLRLOETLS  | AADRCGAALA  | GHQLIRGLGQ  | ECVLSSSPAV  |
| LALQTSLVFS  | RDFGLLVFVR  | KSLNSIEFRE  | CREEILKFLC  | IFLEKMGQKI  |
| APYSVEIKNT  | AKKIPALDL   | LKLLLOTFRS  | LKLLLOTFRS  | SRLMDFKIG   |
| ELFSKFYGEL  | ALKKKIPDVT  | LEKVEYELGLI | LGEVHPSEMI  | NNAENLFAF   |
| LDELKLTQMTS | AVREPKLPLV  | AGCLKGLSSL  | LCNFTKSMEE  | DPQTSREIFN  |
| FVLKAIKRPQI | DLKRYAVPSA  | GLRLLFALHAS | QFSTCCLLDNY | VSLFEVLLKW  |
| CAHTNVELLKK | AALSALLESFL | KQVSNMVAKN  | AEMHKNKLOY  | FMEQFYGIIR  |
| NVDSNNKELLS | IATRGGYGLFA | GPKCVINAKD  | VDFMYVELTO  | RCKOMFLTOT  |
| DTGDDRVYQM  | PSFLQSVASV  | LFLYLDTVPEV | YTPVLEHLVV  | MQIDSFQOYS  |
| PKMQLVCCRA  | IVKVFALAAA  | KGPVLRNCIS  | TVVHQGLIRI  | CSKPPVLPKG  |
| PESSEEDHRA  | SGEVRTGKWK  | VPTYKDYVDL  | FRHLLSSDQM  | MDSLADAEAF  |
| FSVNSSESLS  | NHLLYDEFVK  | SVLKIVEKLD  | LTLEIQTVGE  | QENGDEAPGV  |
| WMIPSTDPA   | NLHPAKPKDF  | SAFINLVYFC  | REILPEKQAE  | FFEPWVYFS   |
| YELILOSTRLL | PLISGFYKLL  | SITVRNKKKI  | KYFEGVSPKS  | LKHSPDPEK   |
| YSCFALFVKF  | GKEVAVKMKQ  | YKDELALASCL | TFLLSLPHNI  | IELDLVRAYVP |
| ALOMAFKGL   | SYTPLAEVGL  | NALEEWSIYI  | DRHVMOPYYK  | DILPCLDGYL  |
| KTSALSDTEK  | NNWEVSALSR  | AAQKGFNKVV  | LKHLKKTKNL  | SSNEAISLEE  |
| IRIRVVQMLG  | SLGGQINKNL  | LTVTSSDEM   | KSYVAWDRREK | RLSFAVPRFE  |
| MKPVIFLDVF  | LPRVTEALALT | ASDRQTKVAA  | CELLHSMVMF  | MLGKATQMP   |
| GGQGAPPYMQ  | LYKRTFPVLL  | RACADVDQVT  | RQLYEPLVMO  | LHWHVFNKK   |
| FESQDVTALL  | EALDGIIVDP  | VDSTLRDFCG  | RCIREFLKWS  | IKKOTPOOEV  |
| KSPVNTKSLF  | KRLYSLALHP  | NAFKRLLGASL | AFNNIYREFR  | EEESLVQOFE  |
| FEALVIYMES  | LALAHADEKS  | LGTIQQCDA   | IDHLCRIIEK  | KHVSFLNKA   |
| RRLPKRGFPPS | ASLCLLDLVK  | WLLAHCGRPQ  | TECRHKSIEL  | FYKVFVLPGL  |
| NRSPNLWKDD  | VLKEEGVSVL  | INTFEGGGCG  | QPSGILAQPT  | LLYLKRGFSL  |
| QATLCLWDL   | LAALAEYNTF  | IGERTVGAALO | VLGTEAOSLI  | LKAAVAFLES  |
| IAMHDIIAAE  | KCFGTGAAGN  | RTSPQEGERY  | NYSKCTVVVR  | IMEFTTLLN   |
| TSPGEWKLK   | KDLCNTHLMR  | VLVQTLCEPA  | SIGFNIGDVQ  | VMAHLPDVQV  |
| NLMKALKMSP  | YKDILETHLR  | EKITAQSIIEE | LCAVNLYGPD  | AQVDRSRLLA  |
| VVSAACKLHR  | AGLHNILPS   | QSTDHLHHSV  | TELLSLVYKG  | IAPGDEROCL  |
| PSLDLSCCKOL | ASGLLELAF   | FGGLCERLVS  | LLLNPAVLST  | ASLGSOSGV   |
| IHFSDHGEYFY | SLFSETINTE  | LKLNLDLAVL  | ELMOSSVDNT  | KMVSAVLNGM  |
| LDQSFREERAN | QKHQGLKLAT  | TILQHWWKCD  | SWWAKDSPLE  | TKMAVLAALLA |
| KILOIDSVS   | FNTSHGSPPE  | VFTTYISLLA  | DTKLDLHLKG  | OAVTLLPFFT  |
| SLTGGSLLEEL | RRVLEQLIVA  | HFPMSREFP   | PGTPRFNNYV  | DCMKKFLDAL  |
| ELSQSPMLLE  | LMTEVLCREO  | QHVMEEELFOS | SFRRIARRGS  | CVTQVGLLES  |
| VYEMFRKDDP  | RLSFTROSFV  | DRSLLTLLWH  | CSLDALREFF  | STIVYDAIDV  |
| LKSRFTKLE   | STFDTOITKK  | MGYKILDMV   | YSRLPKDDVH  | AKESKINQVF  |
| HGSGITEGNE  | LTKTLIKLCY  | DAFTENMAGE  | NOLLERRRLY  | HCAAYNCAS   |
| VICCVFNELEK | FYQGFLEFSEK | PEKNLLIFEN  | LIDLKRRYNF  | PVEVEVPMER  |
| KKKYEIRKE   | AREAAANGDSD | GPSYMSLSY   | LADSTLSEEM  | RQDFDFSTGQV |
| SYSYSQDPR   | PATGRFRRRR  | QRDPTVHDDV  | LELEMEDELNR | HECMAPLAL   |
| VKHMHRSLGP  | PQGEEDSVPR  | DLPSSWMKFLH | GKLGNIIVPL  | NIRLFLAKLV  |
| INTEEVFRPY  | AKHWLSPPLLO | LAASENNGGE  | GHIHYMVVEIV | ATILSWTGLA  |
| TPTGVPKDEV  | LANRLLNFLM  | KHVFHPKRAV  | FRHNLEIKT   | LVECWKDCLS  |
| IPYRLIFEKFF | SGKDPNSKDN  | SVGIQLLGI   | MANDLPPYDP  | QCQIQSSSEYF |
| QALVNNMSFV  | RYKEYVAAAA  | EVLGLILRYV  | MERKNILEES  | LCELVAKOLK  |
| QHONTMEDKF  | IVCLNKVTKS  | FPPPLADRFMN | AVFFLLLPKFH | GVMPLTCLLEV |
| VLCRVEGME   | LYFOLKSKDF  | VOVMRHRDDE  | ROKVCVLDIY  | KMLPKLKPEV  |
| LRLELLNPVVE | FVSHPSSTTCR | EOMYNILMWI  | HDNYRDPPE   | TDNDSQEIFK  |
| LAKDVLILQGL | IDENPGLQLI  | IRNFWSHETR  | LPSNTLDRLL  | ALNSLSYSPKI |
| EVHFLSLATN  | FLLEMTSMSPT | DYPNPMFEHP  | LSCECFQOBYT | IDSDWFRST   |
| VLTPMEVETQ  | ASQGTLOTRT  | QEGSLSARWP  | YAGQIRATQA  | QHDFTLTQTA  |
| DGRSSFDFWLT | GSSDTPPLVDH | TSPSSDLSLF  | AHKRSERLQR  | APLKSQVDF   |
| GKKRRLGLPGD | EVDNKVKGAA  | GRTDLLRLRR  | RFMRDQEKLS  | LMYARKGVAE  |
| QKREKEIKSE  | LKMKQDAQV   | LYRSYRHGDL  | NDIQIKHSSL  | ITPLQAVQOR  |
| DPPIAKOLF   | SLESGILKEM  | DKFKTLSEKN  | NITOKLLODF  | NRLNNTTFSF  |
| FPPFVSCIQD  | ISCOHAALLS  | LDPAAVSAGC  | LASLQQPVG   | RLLEEALLRL  |
| LPAELPAKRV  | RGKARLPPDV  | LRWVELAKLY  | RSIGEYDVL   | GIFTSEIGTK  |
| QITQSALLAE  | ARSDYSEAAK  | QYDEALNKQD  | WVDGEPTEAE  | KDFWELASLD  |
| CYNHLAEWKS  | LEYCSTASID  | SENPPDLNKI  | WSEPFYQETY  | LPMYIRSKLK  |
| LLLOGEADOS  | LLTFIDKAMH  | GELOKAILEL  | HYSOELSLLY  | LLODDVDRAK  |
| YYIQNGIQSF  | MQNYSSIDVL  | LHQSRLLTKLO | SVQALTEIQE  | FISFISKQGN  |
| LSSQVPLKRL  | LNTWTNRYPD  | AKMDPMINIWD | DIITNRCFFL  | SKIEEKLTP   |
| PEDNSMNVDO  | DGDPSSDRMEV | OEOEEDISSI  | IRSCFKFSMKM | KMIDSARKON  |
| NFSLAMKLLK  | ELHKESKTRD  | DWLVSWVQSY  | CRLSHCRSRS  | QGCSEQVLT   |
| LKTVSLLDEN  | NVSSYLSKNI  | LAFRDONILL  | GTTYRIIANA  | LSSEPAQLAE  |
| IEEDKARRIL  | ELSGSSEDS   | EKVIAGLYQR  | AFQHLSEA    | AAEEEAOPPS  |
| WSCGPAAGVI  | DAYMTLADFC  | DOQLRKEEEN  | ASVIDSAELO  | AYPALVVEKM  |
| LKALKLNSNE  | ARLKFPRLLLO | IIERYPPEETL | SLMTKEISSV  | PCWOFISWIS  |
| HMVALDKDQ   | AVAVQHSVEE  | ITDNYPPQAI  | YPFIISSSESY | SFKDSTSTGHP |
| NKEFVARIKS  | KLDQGGVIOQ  | FINALDQLSN  | PELLLFKDWSN | DVRAELAKTK  |
| VNKKNIEMKY  | ERMYYAALGDP | KAPGLGAFRR  | KFIQTFGKEF  | KKHVFGKGSK  |
| LLRMKLSDFN  | DITNMLLLKEM | NKDSKPPGNL  | KECSPWMSDF  | KVEFLRNELE  |
| IPGOYDGRGK  | PLPEYHVRIA  | GFDERVTVMA  | SLRRPKRIII  | RGHDERHEFP  |
| LVKGGEDLRQ  | DQRVEQLFQV  | MNGILAQDSA  | CSQRALQLRT  | YSVDPMTSRL  |
| GLIEWLENTV  | TLKDLLLNTM  | SOEEKAAAYLS | DPRAPPCEYK  | DWLTKMSGKH  |
| DVGAYMLMYK  | GANRTEVTVS  | FRKRESKVP   | DLKRAFVRM   | STSPEAFAL   |
| RSHFASSHAL  | ICISHWILGI  | GDRHLNFMV   | AMETGGVIGI  | DFGHAFGSAT  |
| QFLPVPPELMP | FRLTROFINL  | MLPMKETGLM  | YSIMVHALRA  | FRSDPGLLTN  |
| TMDVVFYK    | FDWKNFEQKM  | LKKGGSWQAE  | INVAEKNWYP  | RQKICYAKRK  |
| LAGANPAVIT  | CDELLLGHEK  | APAFRDYVAV  | ARGSKDHNIR  | AQEPESGLSE  |
| ETQVKCLMDQ  | ATDPNILGRT  | WEGWEPWM    |             |             |

**Figure S6: Peptides for DNA-PK identified by LC-MS/MS analysis using K-CLIP.** The primary sequence of DNA-PK is shown, with amino acids observed in the LC-MS/MS analysis highlighted in yellow and modified amino acids are in green (phosphorylation (S or T) or oxidation (M)). The parameters set were protein threshold- 90%, peptide threshold- 99.9%, with minimum number of peptides set to 1.

Peptide Sequence: (R)DPTVHDDVLEMLELNR(H)

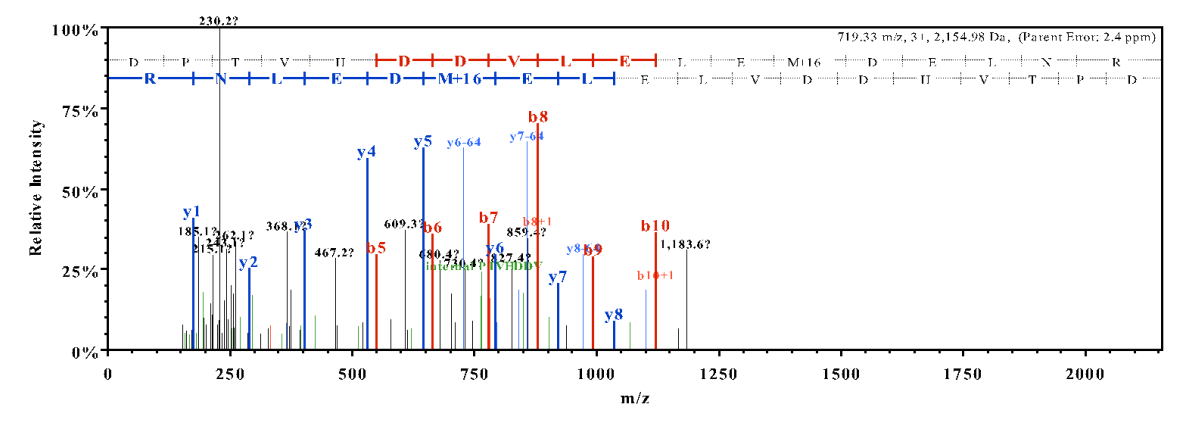

Peptide Sequence: (R)MEVQEQEEDISSLIR(S)

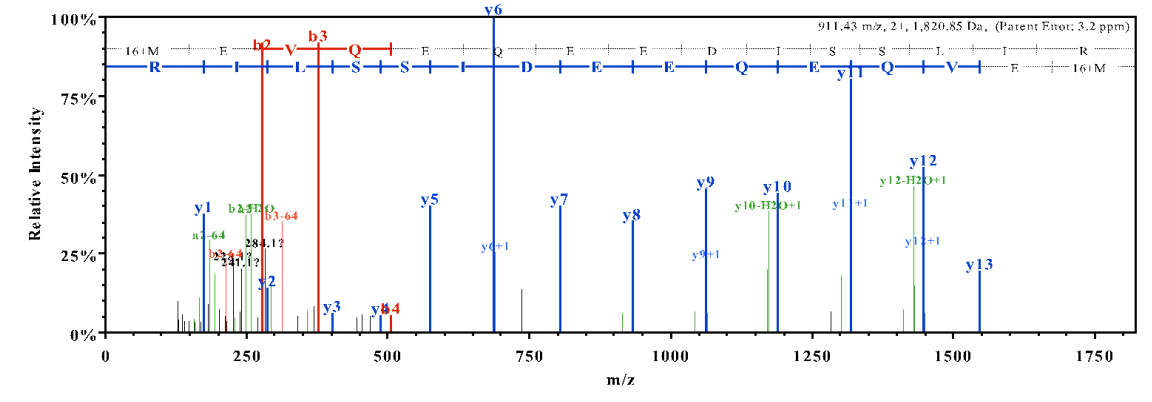

Peptide Sequence: (R)TVGALQVLGTEAQSSLLK(A)

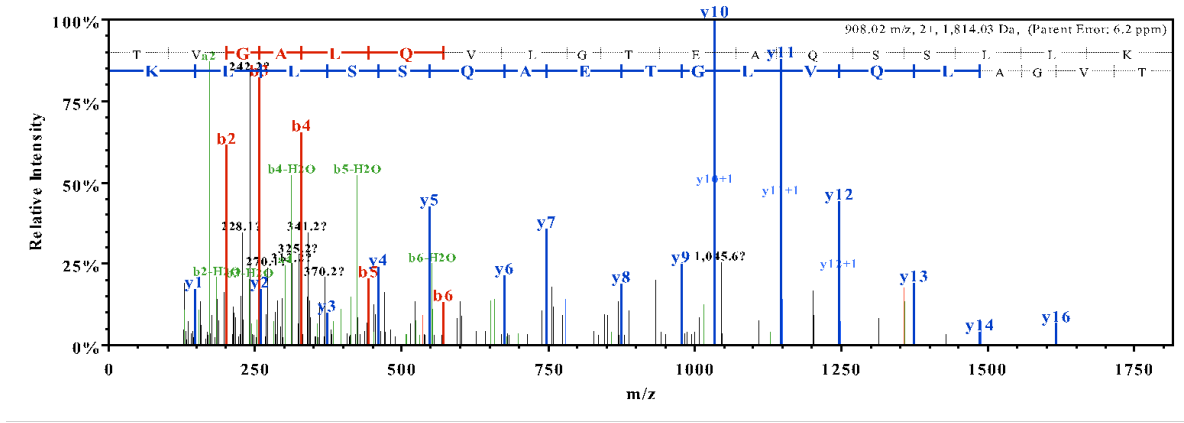

**Figure S7: Annotated spectra of DNA-PK peptides identified by LC-MS/MS analysis, shown in Figure S6. Three illustrative spectra of peptide fragments identified are shown with the peptide sequence on top of each spectrum. Only three of 47 unique peptides are shown here for brevity.**

E2AK2\_HUMAN (100%), 62,097.1 Da

Interferon-induced, double-stranded RNA-activated protein kinase OS=Homo sapiens GN=EIF2AK2 PE=1 SV=2

2 exclusive unique peptides, 2 exclusive unique spectra, 3 total spectra, 23/551 amino acids (4% coverage)

```
MAGDLSAGFF MEEELNTYRQK QGVVLKYQEL PNSGPPHRRR FTFQVIIDGR
EFPEGEGRSK KEAKNAAAKL AVEILNKEKK AVSPLLLTTT NSSEGLSMGN
YIGLINRIAQ KKRLTVNVEQ CASGVHGPEG FHYKCKMGOK EYSIGTGSTK
QEAKQLAAKL AYLQILSEET SVKSDYLS SG SFATTCESQS NSLVTSTLAS
ESSSEGDFS A DTSEINSNSD SLNSSSLLMN GLRNNQRKAK RSLAPRFDLP
DMKETKYTV D KRFGMDFKEI ELIGSGGFGO VFKAHRIDG KTYVIKRVKY
NNEKAEREVK ALAKLDHVNI VHYNGCWDGF DYDPETSDDS LESSDYDPEN
SKNSSRSKTK CLFIOMEFCD KGTLEOWIEK RRG EKLDKVL ALELEQITK
GVDYIHSKKL IHRDLKPSNI FLVDTKOVK I GDFGLVTSLK NDGKRTRSKG
TLRYMSPEOI SSODYGKEVD LYALGLILAE LLHVCDTAFE TSKFFDRLRD
GIISDIFDKK EKTLLQKLLS KKPEDRPNTS EILRRLTVWK KSPEKNERHT
C
```

**Figure S8: Peptides for PKR identified by LC-MS/MS analysis using K-CLIP.** The primary sequence of PKR is shown, with amino acids observed in the MS/MS analysis highlighted in yellow. The parameters set were protein threshold- 90%, peptide threshold- 99.9%, with minimum number of peptides set to 1.

Peptide Sequence: (K)VLALELFEQITK(G)

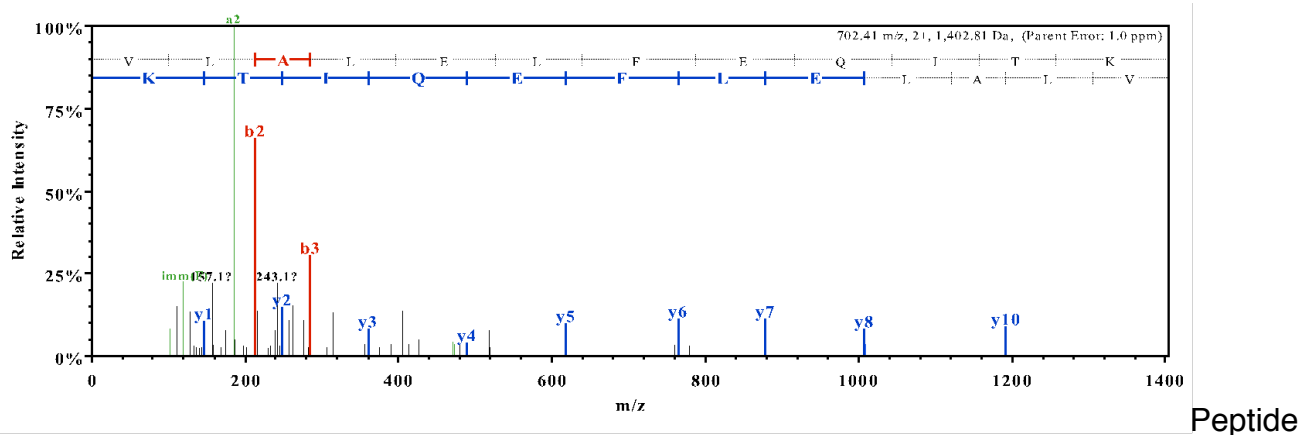

Sequence: (K)VLALELFEQITK(G)

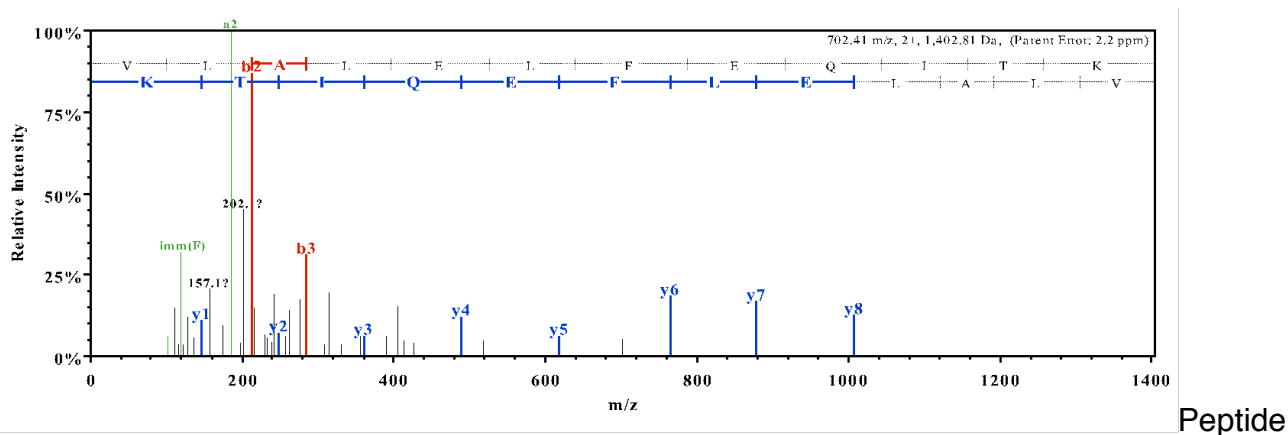

Sequence: (K)IGDFGLVTSLK(N)

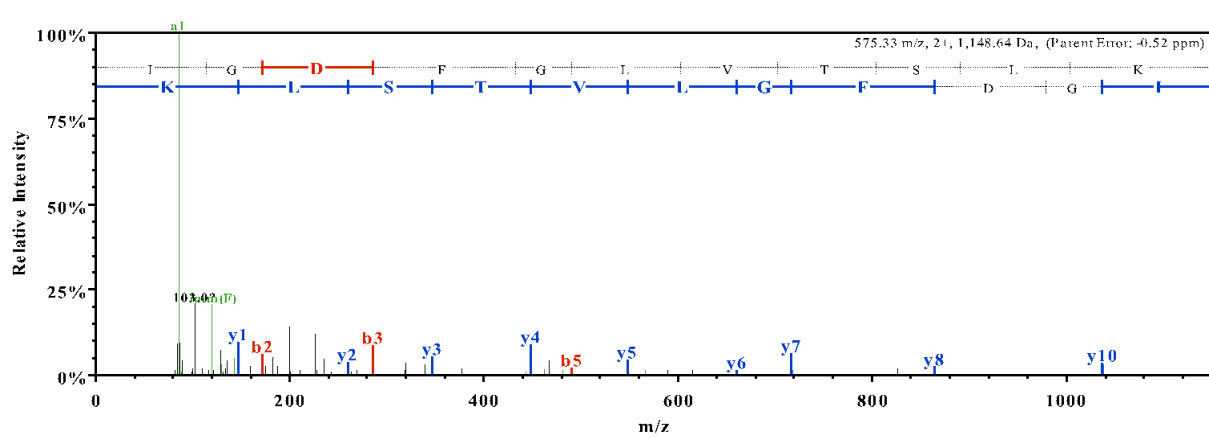

**Figure S9: Annotated spectra of PKR peptides identified by LC-MS/MS analysis, shown in Figure S8. A representation of the peptide fragments identified is shown with the peptide sequence on top of each spectrum.**

MRCKB\_HUMAN (100%), 194,318.0 Da  
 Serine/threonine-protein kinase MRCK beta OS=Homo sapiens GN=CDC42BPB PE=1 SV=2  
 3 exclusive unique peptides, 3 exclusive unique spectra, 3 total spectra, 39/1711 amino acids (2% coverage)

```

MSAKVRLK L EQLLLDGPWR NESALSVETL LDVVLVCLYTE CSHSALRRDK
YVAEFLWAK PFTQLVKEMQ LHREDFEIIK VIGRGA FGEV AVVKMKNTER
IYAMKILNKW EMLKRAETAC FREERDVLVN GDCQWITALH YAFQDENHLY
LVMDYYVGGD LLTLLSKFED KLPEDMARFY I GEMVLAIDS IHQLHYVHRD
IKPDNVLLDV NGHIRLADFG SCLKMND DGT VQSSVAVGTP DYISPEILQA
MEDGMGKYGP ECDWWSLGVC MYEMLYGETP FYAESLVETP GKIMNHEERF
QFPSSHVTDVS EEAKDLIQRL ICSRERRLGQ NGIEDFKKHA FFEGLNWENI
RNLEAPYIPD VSSPSDTSNF DVDDDVL RNT EILPPGSHTG FSGLHLPFIG
FTFTTESCF S DRGSLK SIMQ SNTLTKDEDV QRDLEHSLQM EAYERIRRL
EQEKLELSRK LQESTQTVQS LHGSSRALSN SNRDKEIKKL NEEIERLKNK
IADSNRLERQ LEDTVALRQE REDSTQRLRG LEKQHRVVRQ EKEELHKQLV
EASERLKSQA KELKDAHQQR K LALQEFSEL NERMAELRAQ KQKVSRLRD
KEEEMEVA TQ KVDAMRQEMR RAEKLRK ELE AQLDDAVAEA SKERKLRHS
ENFCKQMESE LEALKVKQGG RGAGATLEHQ QEISKIKSEL EKKVLFYEE
LVRREASHV L EVKNVKKEVH DSESHQLALQ KEILMLKDKL EKSKRERHNE
MEEAVGTIKD KYERERAMLF DENKKLTAEN EKLC SFVDKL TAQNRQLEDE
LQDLAAAKES VAHWEAQIAE I IQWVSDEKD ARGYLQALAS KMTEELALR
SSSLGSR TLD PLWKVRRSQK LDM SARLELQ SALEAEIRAK QLVQEE LRKV
KDANLTLESK LKDSEAKNRE LLEEMEILKK KMEEKFRADT GLKLPDFQDS
IFEYFNTAPL AHDLTFR TSS ASEQETQAPK PEASPSMSVA ASEQQEDMAR
PPQRPSAVPL PTTQALALAG PKPKAHQFSI KSFSSPTQCS HCTSLMVGLI
RQGYACEVCS FACHVSCKD G APQVCP I PPE QSKRPLGV DV QRGIGTAYKG
HVKVPKPTGV KKGWQRAYAV VCDCKLFLYD LPEGKSTQPG VIASQVLDLR
DDEFSSVSSVL ASDVIHATR DIPCIFR VTA SLLGAPSKTS SLLILTENEN
EKRKWVGILE GLQSI LHKNR LRNQVHVPL EAYDSSLPLI KAILTAAIVD
ADR IAVGLEE GLYVIEVTRD VIVRAADCKK VHQIELAPRE KIVILLCGRN
HHVHLYPWS LDGAEGSFDI KLPETKGCQL MATATLKRNS GTCLFVAVKR
LILCYEIQRT KPFFHRKFNEI VAPGSVQCLA VLRDRLCVGY PSGFCLLSIQ
GDGQP LNLVN PNDPSLAFLS QQSFDALCAV ELESEEEYLLC FSHMGLYVDP
QGRRAR AQEL MWPAAPVACS CSPHTVTVYS EYGVDVFDVR TMEWVQTIGL
RRIRPLNSEG TLNLLNCEPP RL IYFKSKFS GAVLNV P DTS DNSKKQMLRT
RSKRRFVFKV PEEERLQQR EMLRDP ELRS KMI SNPTN FN HVAHMGPGDG
MQVLM DPLS AVPPSQEERP GPAPTNLARQ PPSRNKPYIS WPSGGSEPS
VTVPLRSM SD PDQDFDKEPD SDSTKHSTPS NSSNP SGPPS PNSPHRSQLP
LEGLEQPA CD T

```

**Figure S10: Peptides for MRCKβ identified by LC-MS/MS analysis using K-CLIP.** The primary sequence of MRCKβ is shown, with amino acids observed in the MS/MS analysis highlighted in yellow. The parameters were, protein threshold- 90%, peptide threshold- 99.9%, with minimum number of peptides set to 1.



Peptide Sequence: (K)LALQEFSELNER(M)

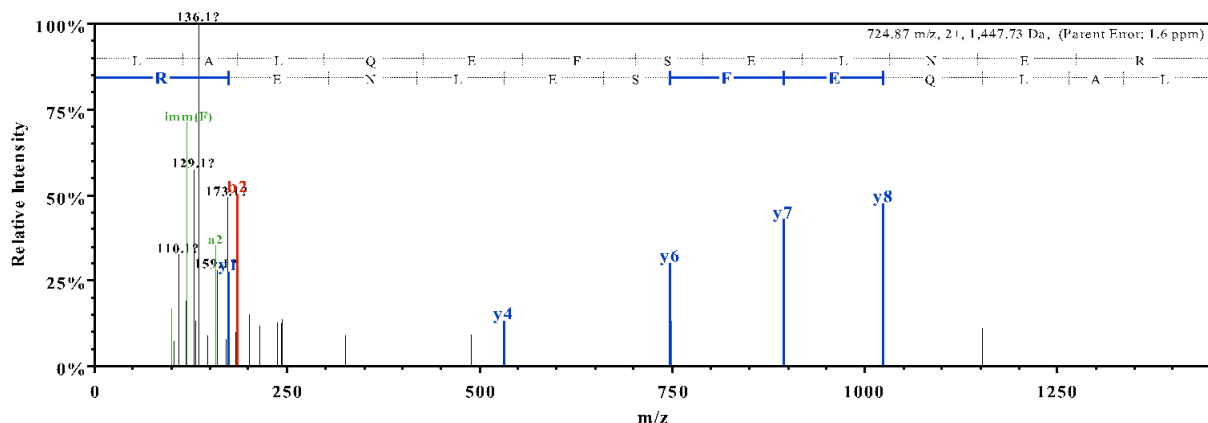

Peptide Sequence: (K)ELEAQLDDAVAEASK(E)

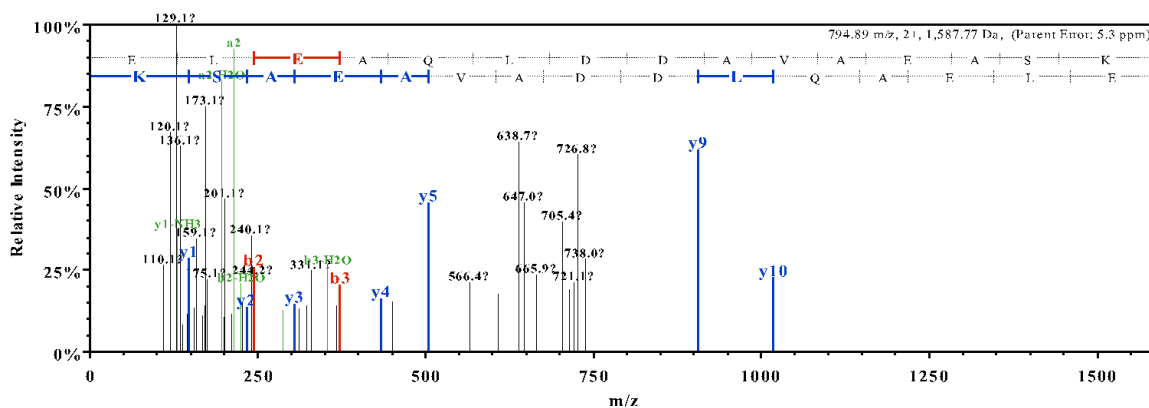

Peptide

Sequence: (K)AILTAAIVDADR(I)

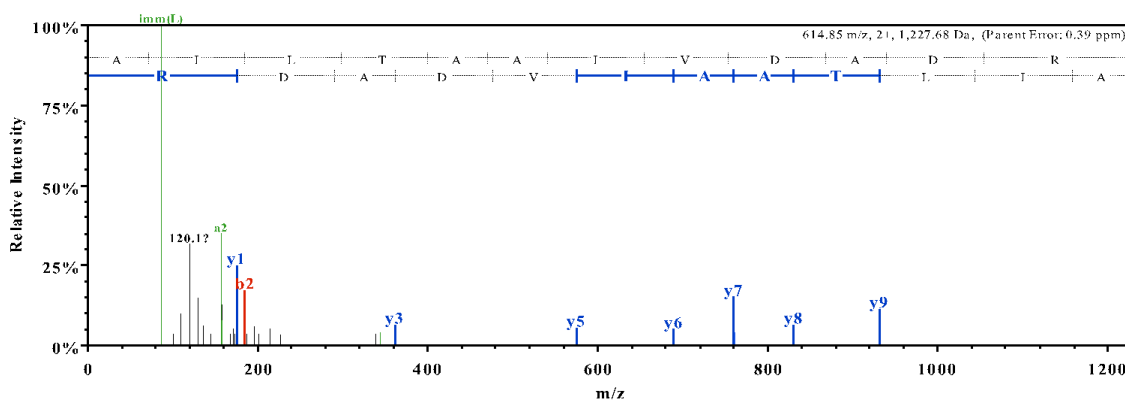

Figure S11: The annotated spectra of MRCK $\beta$  peptides identified by LC-MS/MS analysis, shown in Figure S10. A representation of the peptide fragments identified is shown with the peptide sequence on top of each spectrum.

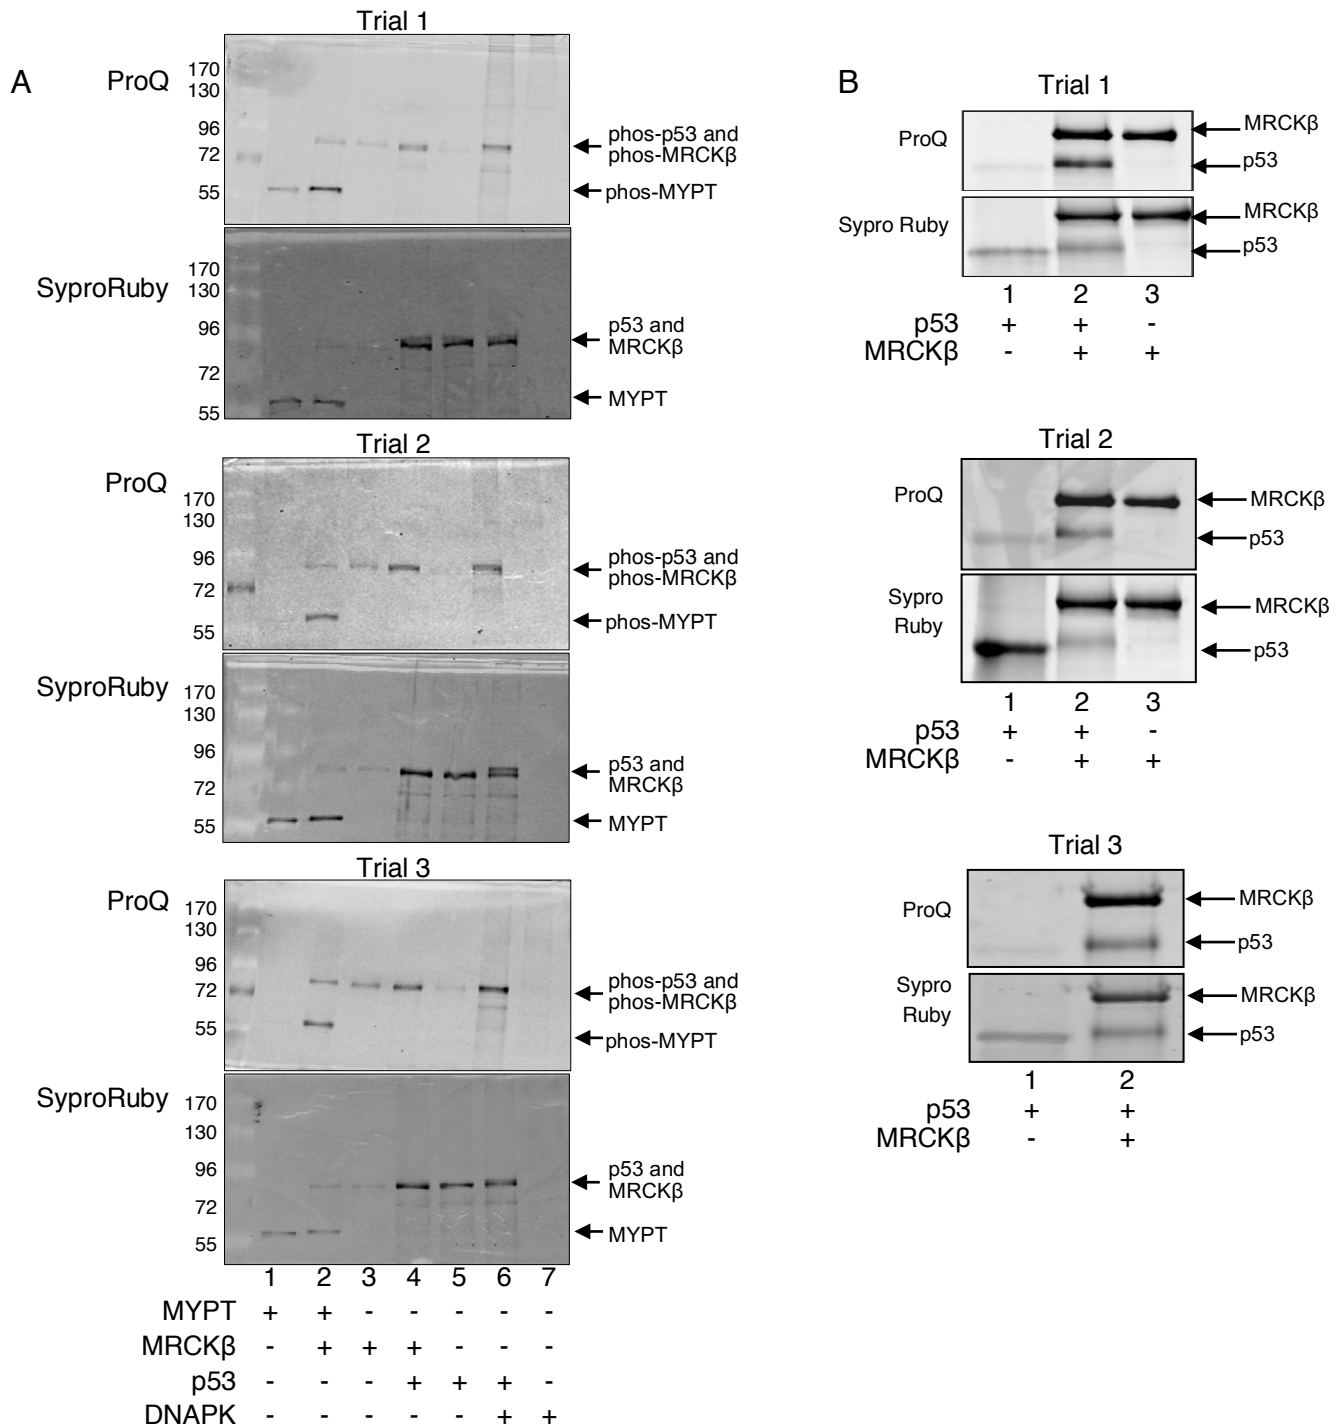

**Figure S12: *In vitro* kinase assays with p53 and MRCKβ.** A) Recombinant MYPT1 (0.5 μg, lanes 1-2) or p53 (0.5 μg, lanes 4-6) was incubated with recombinant MRCKβ (0.025 μg, lanes 2-4) or DNAPK (0.025 μg, lanes 6-7), along with ATP (4 mM). After separation by SDS-PAGE, phosphoproteins were visualized with ProQ Diamond stain (top) and total proteins were observed with SyproRuby stain (bottom). Three trials are shown here, with a cropped version of Trial 1 shown in Figure 3A of the manuscript. B) Large scale reactions- Recombinant p53 (5.5 μg, lanes 1-2) was incubated with recombinant MRCKβ (1.5 μg, lanes 2-3) and ATP (4 mM, all lanes), separated by SDS-PAGE, and visualized with ProQ Diamond phosphoprotein stain (top) or SyproRuby total protein stain (bottom). Autophosphorylation of MRCKβ was observed as a positive control for kinase activity. Bands corresponding to p53 and MRCKβ are indicated with arrows in all gel images. Three trials are shown here.

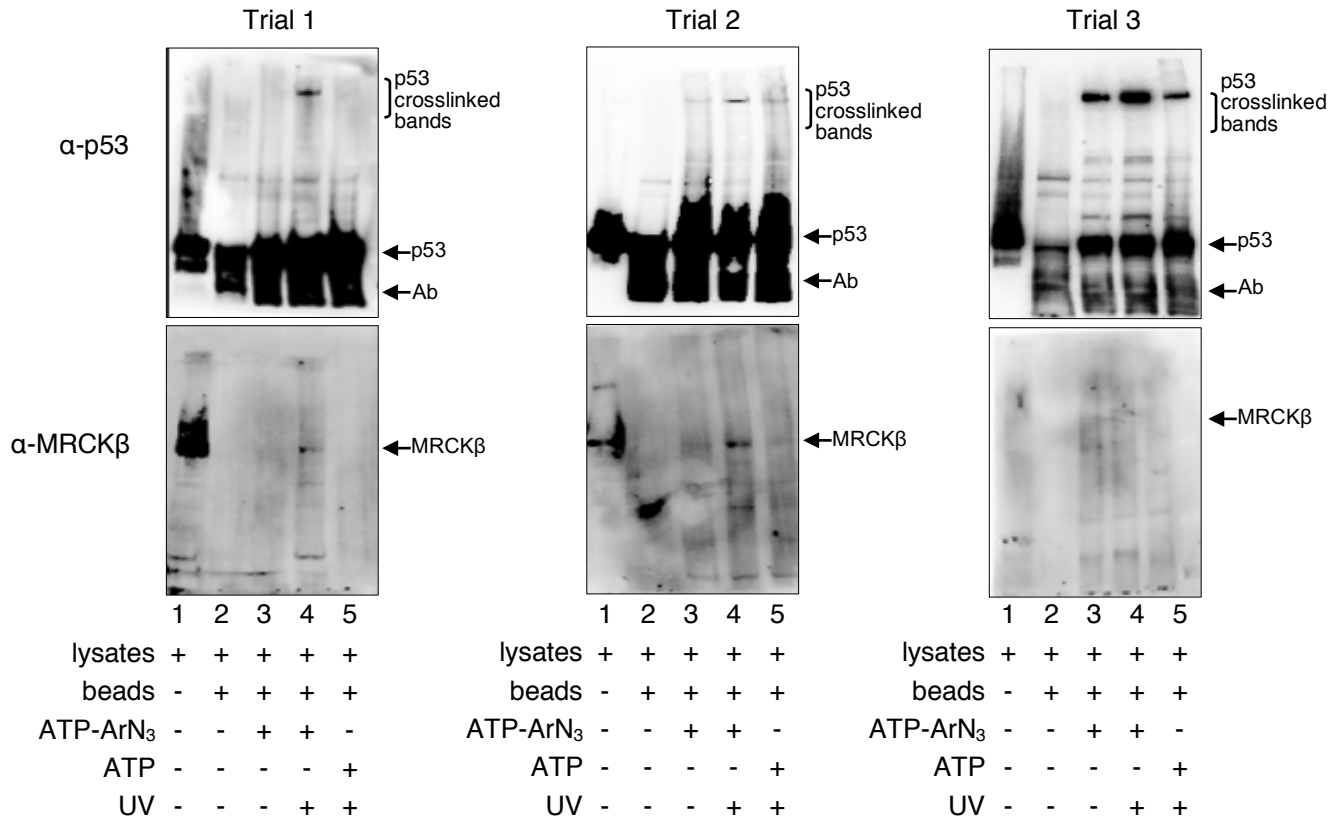

**Figure S13: K-CLIP validates MRCK $\beta$  is a p53 kinase.** K-CLIP was performed with RKO cell lysates after crosslinking using ATP-ArN<sub>3</sub> (lanes 3-4) or ATP (lane 5) either in the absence (lanes 1-3) or presence (lanes 4-5) of UV. After SDS-PAGE separation, both p53 ( $\alpha$ -p53) and MRCK $\beta$  ( $\alpha$ -MRCK) were visualized using Western blot analysis. Bands corresponding to p53 and MRCK $\beta$  are indicated with arrows in all gel images. Three trials are shown here, with a cropped version of Trial 1 shown in Figure 3B of the manuscript.

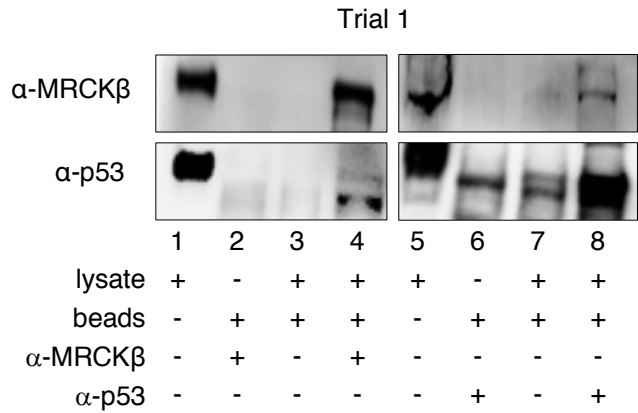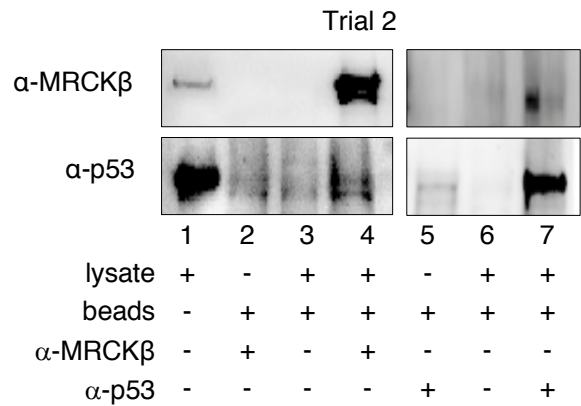

**Figure S14: Coimmunoprecipitation studies of MRCK $\beta$  and p53.** Coimmunoprecipitation was performed with RKO cell lysates and either MRCK $\beta$  or p53 antibodies, along with protein A/G agarose beads. After SDS-PAGE separation, Western blot analysis was performed with the MRCK $\beta$  ( $\alpha$ -MRCK) or p53 ( $\alpha$ -p53) antibodies. Two trials are shown here with a third trial shown in Figure 3C of the manuscript.

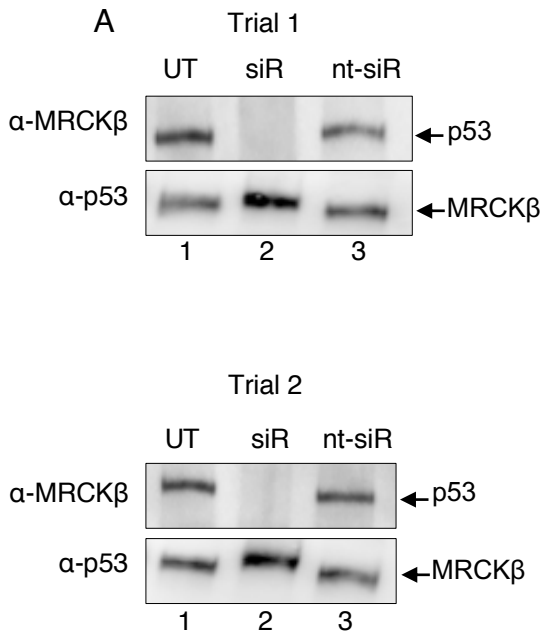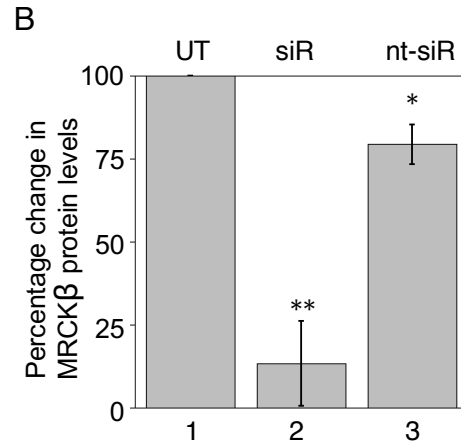

**Figure S15: MRCKβ knockdown and p53 expression levels in RKO cells.** A. RKO cells were untreated (UT, lane 1), treated with a pool of MRCKβ-targeting siRNA (siR, lane 2), or treated with a control non-targeting pool of siRNA (nt-siR, lane 3), along with a transfection reagent. After 72 hours at 37 °C, cells were harvested and lysed, before cellular proteins were separated by SDS-PAGE and visualized with both MRCKβ (α-MRCK) and p53 (α-p53) antibodies. Protein bands are indicated with arrows. Two trials are shown here, with another shown in Figure 3D of the manuscript. B) MRCKβ expression levels were quantified, with the mean and standard error shown. Data were analyzed by Prism software for statistical significance (\*p = 0.0265 \*\*p = 0.0025).

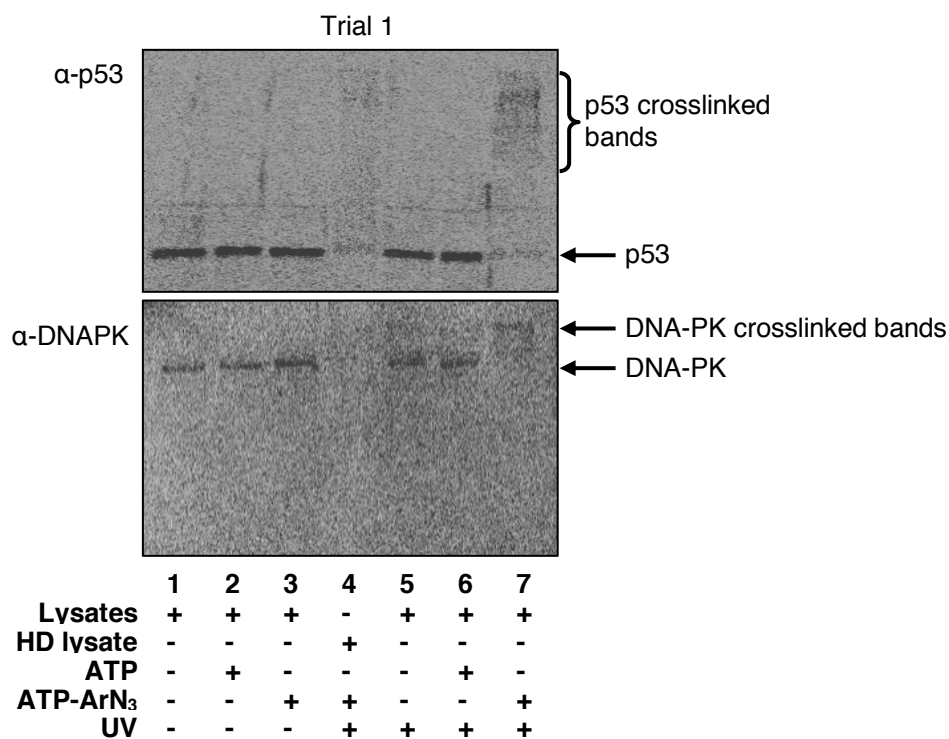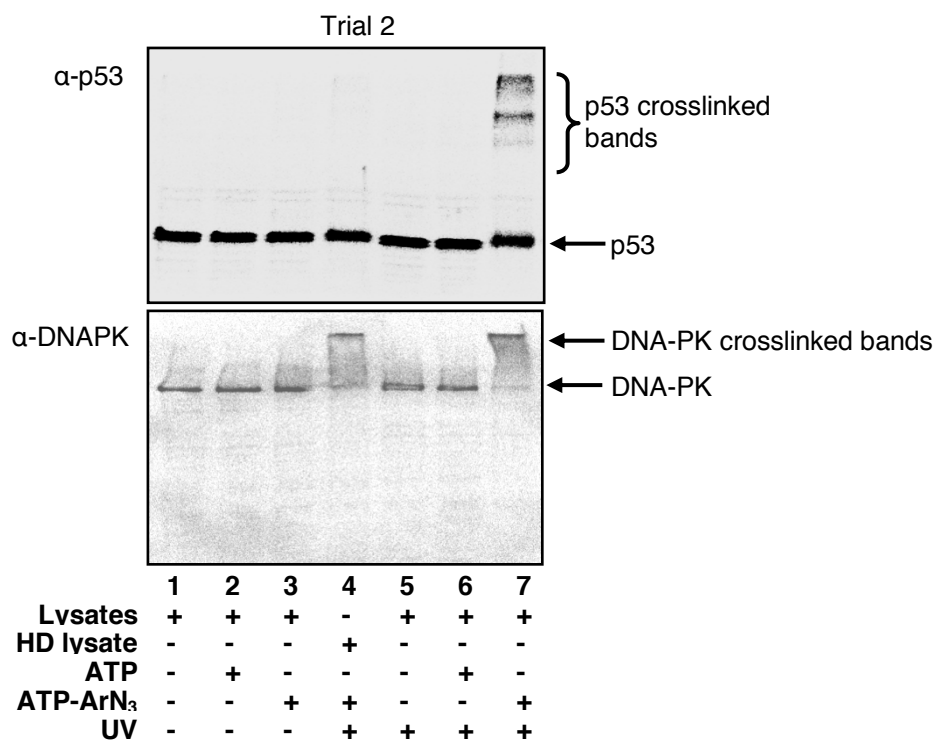

**Figure S16: Kinase-catalyzed crosslinking validation reactions with DNAPK.** Kinase-catalyzed crosslinking was performed using HeLa cell lysates (all lanes) and ATP-ArN<sub>3</sub> analog with or without UV, followed by SDS-PAGE separation and visualization with a p53 antibody (A and B, top) or a DNA-PK antibody (bottom). The high molecular weight crosslinked complexes of p53 and DNAPK are indicated with arrows. Two trials are shown here with a third trial shown in Figure 4A of the manuscript.

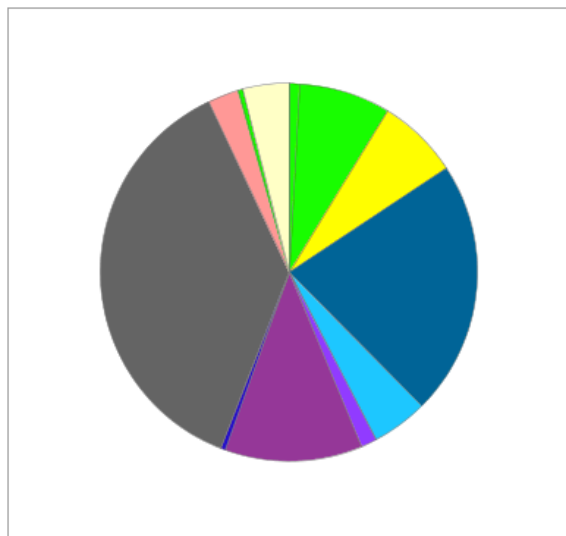

Click to get gene list for a category:

- [apoptotic process \(GO:0006915\)](#)
- [biological regulation \(GO:0065007\)](#)
- [cellular component organization or biogenesis \(GO:0071840\)](#)
- [cellular process \(GO:0009987\)](#)
- [developmental process \(GO:0032502\)](#)
- [immune system process \(GO:0002376\)](#)
- [localization \(GO:0051179\)](#)
- [locomotion \(GO:0040011\)](#)
- [metabolic process \(GO:0008152\)](#)
- [multicellular organismal process \(GO:0032501\)](#)
- [reproduction \(GO:0000003\)](#)
- [response to stimulus \(GO:0050896\)](#)

Color picker powered by Web Colors by VisiBone

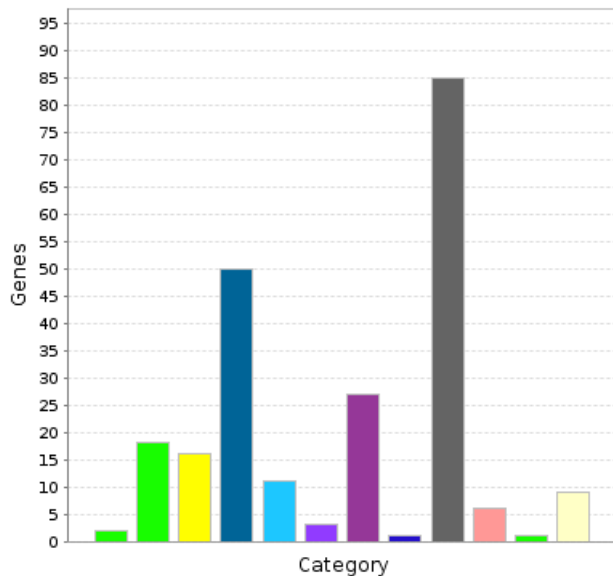

Click to get gene list for a category:

- [apoptotic process \(GO:0006915\)](#)
- [biological regulation \(GO:0065007\)](#)
- [cellular component organization or biogenesis \(GO:0071840\)](#)
- [cellular process \(GO:0009987\)](#)
- [developmental process \(GO:0032502\)](#)
- [immune system process \(GO:0002376\)](#)
- [localization \(GO:0051179\)](#)
- [locomotion \(GO:0040011\)](#)
- [metabolic process \(GO:0008152\)](#)
- [multicellular organismal process \(GO:0032501\)](#)
- [reproduction \(GO:0000003\)](#)
- [response to stimulus \(GO:0050896\)](#)

Color picker powered by Web Colors by VisiBone

**Figure S17: Analysis of the biological function of the 128 proteins identified in the p53 K-CLIP using Panther GO-Slim (pantherdb.org).<sup>1</sup>** A) Pie chart showing the relative percentage of proteins in each biological function classification. B) Bar graph showing the number of genes represented in each biological process. The largest gene pool of 85 genes (37%) were associated with metabolic processes (brown) and included many proteins with known association with p53 (Figure 5A in manuscript and Table S1), including DNA-PK, PKR, and MRCK $\beta$ .

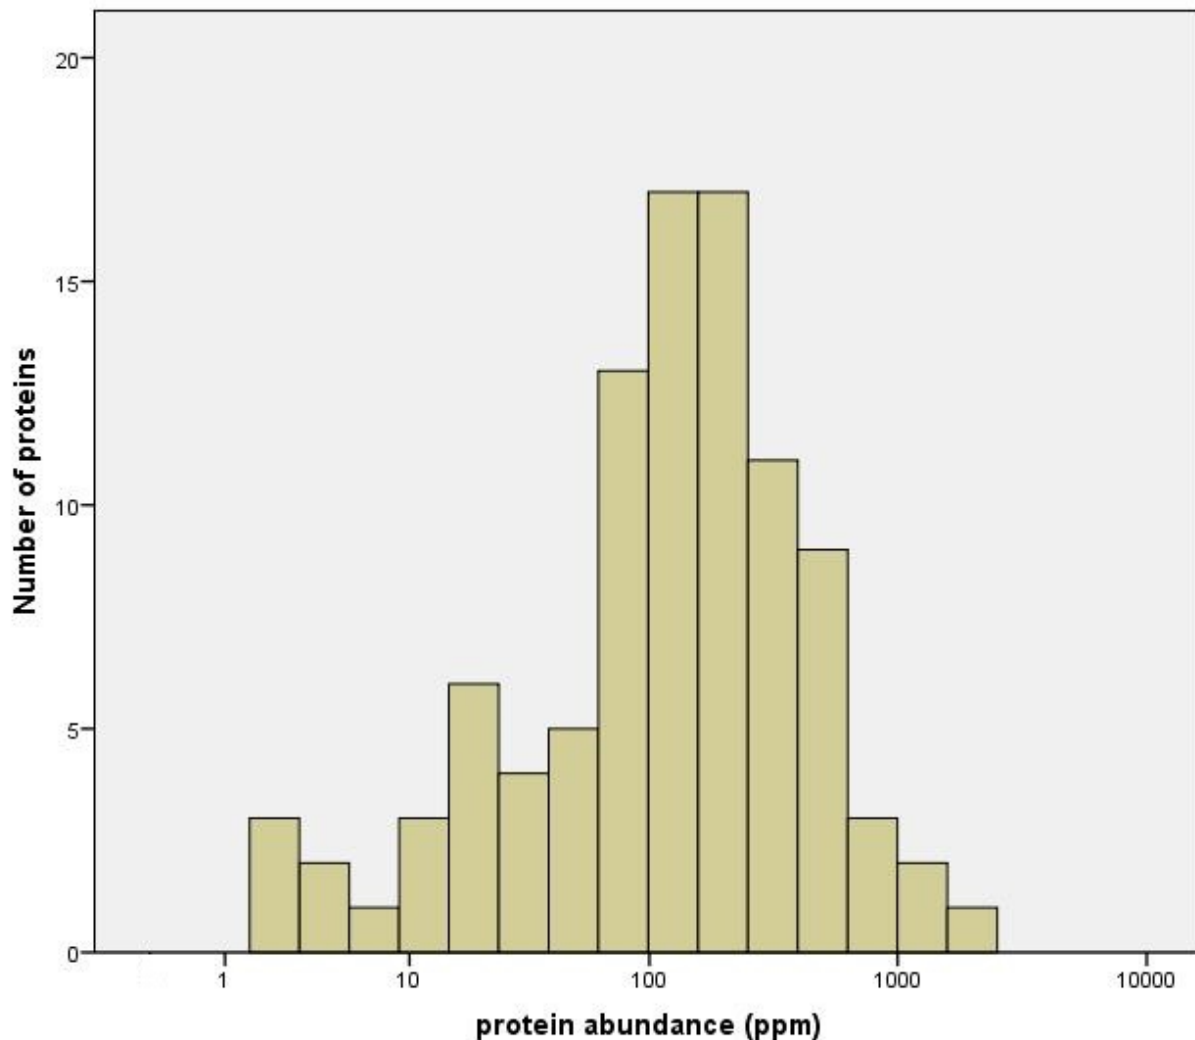

**Figure S18: Abundance analysis of the proteins identified by K-CLIP.** Previously published data on protein abundance in RKO cells<sup>2</sup> were obtained for the K-CLIP enriched proteins from Pax database<sup>3</sup> and then plotted. K-CLIP identified proteins with a range of abundance from 2 to 2029 ppm. The published range of protein abundance in RKO cells is from 0.01 to 10,000.

## References

1. Mi, H.; Muruganujan, A.; Thomas, P. D., PANTHER in 2013: modeling the evolution of gene function, and other gene attributes, in the context of phylogenetic trees. *Nucleic Acids Res* **2013**, *41* (Database issue), D377-86.
2. Geiger, T.; Wehner, A.; Schaab, C.; Cox, J.; Mann, M., Comparative proteomic analysis of eleven common cell lines reveals ubiquitous but varying expression of most proteins. *Mol Cell Proteomics* **2012**, *11* (3), M111 014050.
3. Wang, M.; Herrmann, C. J.; Simonovic, M.; Szklarczyk, D.; von Mering, C., Version 4.0 of PaxDb: Protein abundance data, integrated across model organisms, tissues, and cell-lines. *Proteomics* **2015**, *15* (18), 3163-8.
